# Supplementary material for: Evidence for Better Lives Study: a comparative birth-cohort study on child exposure to violence and other adversities in eight low- and middle-income countries - foundational research (study protocol)
Source: PubMed Central journal article supplement — BMJ Open. 2020 Oct 10;10(10):e034986. doi: 10.1136/bmjopen-2019-034986 (PMC7552842; doi:10.1136/bmjopen-2019-034986), 2020-10-10
Supplement: bmjopen-2019-034986.draft_revisions.pdf [file bmjopen-2019-034986.draft_revisions.pdf]

# BMJ Open

BMJ Open is committed to open peer review. As part of this commitment we make the peer review history of every article we publish publicly available.

When an article is published we post the peer reviewers' comments and the authors' responses online. We also post the versions of the paper that were used during peer review. These are the versions that the peer review comments apply to.

The versions of the paper that follow are the versions that were submitted during the peer review process. They are not the versions of record or the final published versions. They should not be cited or distributed as the published version of this manuscript.

BMJ Open is an open access journal and the full, final, typeset and author-corrected version of record of the manuscript is available on our site with no access controls, subscription charges or pay-per-view fees (<http://bmjopen.bmj.com>).

If you have any questions on BMJ Open's open peer review process please email [info.bmjopen@bmj.com](mailto:info.bmjopen@bmj.com)

# BMJ Open

## Evidence for Better Lives Study: A comparative birth-cohort study on child exposure to violence and other adversities in eight low- and middle-income countries – Foundational Research.

|                               |                                                                                                                                                                                                                                                                                                                                                                                                                                                                                                                                                                                                                                                                                                                                                                                                                                                                                                                                                                                                                                                                                                                                                                                                      |
|-------------------------------|------------------------------------------------------------------------------------------------------------------------------------------------------------------------------------------------------------------------------------------------------------------------------------------------------------------------------------------------------------------------------------------------------------------------------------------------------------------------------------------------------------------------------------------------------------------------------------------------------------------------------------------------------------------------------------------------------------------------------------------------------------------------------------------------------------------------------------------------------------------------------------------------------------------------------------------------------------------------------------------------------------------------------------------------------------------------------------------------------------------------------------------------------------------------------------------------------|
| Journal:                      | <i>BMJ Open</i>                                                                                                                                                                                                                                                                                                                                                                                                                                                                                                                                                                                                                                                                                                                                                                                                                                                                                                                                                                                                                                                                                                                                                                                      |
| Manuscript ID                 | bmjopen-2019-034986                                                                                                                                                                                                                                                                                                                                                                                                                                                                                                                                                                                                                                                                                                                                                                                                                                                                                                                                                                                                                                                                                                                                                                                  |
| Article Type:                 | Protocol                                                                                                                                                                                                                                                                                                                                                                                                                                                                                                                                                                                                                                                                                                                                                                                                                                                                                                                                                                                                                                                                                                                                                                                             |
| Date Submitted by the Author: | 14-Oct-2019                                                                                                                                                                                                                                                                                                                                                                                                                                                                                                                                                                                                                                                                                                                                                                                                                                                                                                                                                                                                                                                                                                                                                                                          |
| Complete List of Authors:     | Valdebenito, Sara; University of Cambridge, Institute of Criminology<br>Murray, Aja; The University of Edinburgh, Department of Psychology<br>Hughes, Claire ; University of Cambridge, Centre for Family Research<br>Băban, Adriana; Babes-Bolyai University, Romania<br>Fernando, Asvini; University of Kelaniya Faculty of Medicine<br>Madrid, Bernadette J. ; University of the Philippines Manila,<br>Ward, Catherine; University of Cape Town, Department of Psychology<br>Osafo, Joseph; University of Ghana<br>Michael, Dunne; Queensland University of Technology School of Public Health and Social Work<br>Sikander, Siham; Health Services Academy<br>Walker, Susan; University of the West Indies<br>Thang, Vo Van; Hue University of Medicine and Pharmacy<br>Tomlinson, Mark; Stellenbosch University, Psychology; Queen's University Belfast, School of Nursing and Midwifery<br>Fearon, Pasco; University College London<br>Shenderovich, Yulia; University of Oxford<br>Marlow, Marguerite; Stellenbosch University<br>Chathurika , Deshanie ; University of Kelaniya<br>Taut, Diana; Babes-Bolyai University<br>Eisner, Manuel; University of Cambridge, Institute of Criminology |
| Keywords:                     | EPIDEMIOLOGY, MENTAL HEALTH, Prenatal diagnosis < OBSTETRICS, Child protection < PAEDIATRICS, Community child health < PAEDIATRICS                                                                                                                                                                                                                                                                                                                                                                                                                                                                                                                                                                                                                                                                                                                                                                                                                                                                                                                                                                                                                                                                   |
|                               |                                                                                                                                                                                                                                                                                                                                                                                                                                                                                                                                                                                                                                                                                                                                                                                                                                                                                                                                                                                                                                                                                                                                                                                                      |

SCHOLARONE™  
Manuscripts

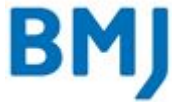

I, the Submitting Author has the right to grant and does grant on behalf of all authors of the Work (as defined in the below author licence), an exclusive licence and/or a non-exclusive licence for contributions from authors who are: i) UK Crown employees; ii) where BMJ has agreed a CC-BY licence shall apply, and/or iii) in accordance with the terms applicable for US Federal Government officers or employees acting as part of their official duties; on a worldwide, perpetual, irrevocable, royalty-free basis to BMJ Publishing Group Ltd ("BMJ") its licensees and where the relevant Journal is co-owned by BMJ to the co-owners of the Journal, to publish the Work in this journal and any other BMJ products and to exploit all rights, as set out in our [licence](#).

The Submitting Author accepts and understands that any supply made under these terms is made by BMJ to the Submitting Author unless you are acting as an employee on behalf of your employer or a postgraduate student of an affiliated institution which is paying any applicable article publishing charge ("APC") for Open Access articles. Where the Submitting Author wishes to make the Work available on an Open Access basis (and intends to pay the relevant APC), the terms of reuse of such Open Access shall be governed by a Creative Commons licence – details of these licences and which [Creative Commons](#) licence will apply to this Work are set out in our licence referred to above.

Other than as permitted in any relevant BMJ Author's Self Archiving Policies, I confirm this Work has not been accepted for publication elsewhere, is not being considered for publication elsewhere and does not duplicate material already published. I confirm all authors consent to publication of this Work and authorise the granting of this licence.

1  
2  
3 **Evidence for Better Lives Study: A comparative birth-cohort study on child exposure to**  
4 **violence and other adversities in eight low- and middle-income countries – Foundational**  
5 **Research.**  
6  
7  
8  
9

10 Sara Valdebenito<sup>1</sup>, Aja Louise Murray<sup>2</sup>, Claire Hughes<sup>3</sup>, Adriana Baban<sup>4</sup>, Asvini D. Fernando<sup>5</sup>,  
11 Bernadette Madrid<sup>6</sup>, Catherine L. Ward<sup>7</sup>, Joseph Osafo<sup>8</sup>, Michael P. Dunne<sup>9</sup>, Siham Sikander<sup>10</sup>,  
12 Susan Walker<sup>11</sup>, Vo Van Thang<sup>12</sup>, Mark Tomlinson<sup>13-14</sup>, Pasco Fearon<sup>15</sup>, Yulia Shenderovich<sup>16</sup>,  
13  
14  
15 Marguerite Marlow<sup>13</sup>, Deshanie Chathurika<sup>5</sup>, Diana Taut<sup>4</sup> and Manuel Eisner<sup>1</sup>  
16  
17  
18

- 19 1. Institute of Criminology, University of Cambridge, Cambridge, United Kingdom.
- 20 2. Department of Psychology, University of Edinburgh, Edinburgh, United Kingdom.
- 21 3. Department of Psychology, University of Cambridge, Cambridge, United Kingdom
- 22 4. Department of Psychology, Babes-Bolyai University, Cluj-Napoca, Romania
- 23 5. Department of Paediatrics, Faculty of Medicine, University of Kelaniya, Colombo,  
24 Sri Lanka
- 25 6. Child Protection Unit, University of the Philippines, Manila, Philippines
- 26 7. Department of Psychology and Safety and Violence Initiative, University of Cape  
27 Town, Cape Town, South Africa
- 28 8. Department of Psychology, University of Ghana, Legon, Accra, Ghana
- 29 9. School of Public Health and Social Work, Queensland University of Technology,  
30 Brisbane, Australia
- 31 10. Health Services Academy, Islamabad, Pakistan
- 32 11. Caribbean Institute for Health Research, The University of the West Indies, Kingston,  
33 Jamaica
- 34 12. Institute of Community Health Research, Faculty of Public Health, College of  
35 Medicine and Pharmacy, Hue University, Hue, Vietnam
- 36 13. Department of Psychology, Stellenbosch University, Stellenbosch, South African  
37 Institute for Life Course Health Research, Department of Global Health, Stellenbosch  
38 University, Cape Town, South Africa
- 39 14. School of Nursing and Midwifery, Queens University, Belfast, United Kingdom
- 40 15. Research Department of Clinical, Educational and Health Psychology, University  
41 College London, London, United Kingdom.
- 42 16. Centre for Evidence-Based Intervention, Department of Social Policy & Intervention,  
43 University of Oxford, Oxford, United Kingdom.
- 44  
45  
46  
47  
48  
49  
50  
51  
52  
53

54 **Corresponding author:**

55 Sara Valdebenito, Institute of Criminology, University of Cambridge, Sidgwick Avenue,  
56 Cambridge CB3 9DA, United Kingdom.

57 Email: sv331@cam.ac.uk  
58  
59  
60

## ABSTRACT

**Introduction.** Violence against children is a health, human rights and social problem affecting approximately half of the world's children. Its effects begin at pre-natal stages with long-lasting impacts on later health and wellbeing. The *Evidence for Better Lives Study* (EBLS) aims to produce high-quality longitudinal data from cities in eight low- and middle- income countries (LMICs) – Ghana, Jamaica, Pakistan, the Philippines, Romania, South Africa, Sri Lanka, and Vietnam – to support effective intervention to reduce violence against children. EBLS-Foundational Research tests critical aspects of the planned EBLS, including participant recruitment and retention, data collection and analysis. Alongside epidemiological estimates of levels and predictors of exposure to violence and adversity during pregnancy, we explore mechanisms that may link exposure to violence to mother's biological stress markers and subjective well-being.

**Methods and analyses.** EBLS-FR is a short longitudinal study in a sample of 1,200 pregnant women. Data are collected during the last trimester of pregnancy and 2-6 months after birth. The questionnaire for participating women has been translated into nine different languages. Measures obtained from mothers include, among others, mental and physical health, attitudes to corporal punishment, adverse childhood experiences, pre-natal intimate partner violence (p-IPV), substance use, and social/community support. Hair and dry blood spot (DBS) samples are collected from the pregnant women to measure stress markers. To explore research participation among fathers, EBLS-FR recruits 300 fathers in Philippines and Sri Lanka.

**Ethics and dissemination.** Ethics approvals have been granted for this study by all recruiting sites and universities in the project. Results will be disseminated through journal publications, conferences and seminar presentations involving local communities, health services and other stakeholders. Findings from this work will help to adjust the subsequent stages of the EBLS project.

1  
2  
3 **Key words:** Peri-natal intimate partner violence, low- and middle-income countries, child  
4 development, violence exposure, cross-cultural violence research, children's rights, violence  
5 against women and children, violence prevention, perinatal and childhood adversity.  
6  
7  
8  
9  
10  
11  
12

### 13 **STRENGTHS AND LIMITATIONS**

- 14 - Evidence for Better Lives-Foundational Research is designed to inform a large-scale,  
15 birth cohort study in eight cities across the world.
  - 16 - Data collection instruments, recruitment strategies, and data management procedures  
17 are implemented and tested to collect comparable data on exposure to violence.  
18
  - 19 - Participants have been selected using a non-probabilistic sampling strategy.  
20  
21  
22  
23  
24  
25  
26  
27  
28  
29  
30  
31  
32  
33  
34  
35  
36  
37  
38  
39  
40  
41  
42  
43  
44  
45  
46  
47  
48  
49  
50  
51  
52  
53  
54  
55  
56  
57  
58  
59  
60
- Generalisation to the broader underlying population is limited.

1  
2  
3 Around half of children worldwide experience some form of interpersonal violence (1).  
4  
5 Previous evidence suggests that exposure to violence interferes with children's neurological  
6  
7 and socio-emotional development, contributes to lasting behavioural problems and has lifelong  
8  
9 effects on well-being, health, and productivity (2-6). While the negative impact of violence has  
10  
11 been extensively documented, less is known about the effect of prenatal exposure to prenatal  
12  
13 intimate partner violence (p-IPV) at early stages of child development. Recent research  
14  
15 suggests that exposure to IPV during the prenatal period can be linked to a number of morbid  
16  
17 conditions such as antepartum haemorrhage (11), low birth weight, preterm delivery (4) and  
18  
19 other indices of poor foetal health (7-10). While the mechanism explaining these outcomes  
20  
21 remain unclear, multiple possible pathways linking p-IPV with child development outcomes  
22  
23 have been suggested, such as via mental illness, substance use, healthcare underutilisation,  
24  
25 poor emotional attachment to the foetus, maternal stress, systemic inflammation and the  
26  
27 regulation of specific genes relevant to, for example, the functioning of the hypothalamic-  
28  
29 pituitary-adrenal axis (12, 13). Research in humans and other mammals suggest that exposure  
30  
31 to dangerous levels of cortisol can have long-lasting impact on multiples areas of the brain,  
32  
33 affecting, for instance, memory, verbal IQ, and behaviour (10,14).  
34  
35  
36  
37  
38  
39  
40  
41

42 The implementation of preventive policies informed by data has been proven to contribute to  
43  
44 the reduction of violence against children (15). However, to date, most research into violence  
45  
46 during the first years of children's lives has been conducted using cross-sectional, retrospective  
47  
48 designs in affluent societies (16, 17). Little is known from low- and middle-income countries  
49  
50 (LMICs), where most of the world's children live and where resources to address these  
51  
52 problems are limited (18,19).  
53  
54  
55  
56  
57  
58  
59  
60

1  
2  
3 In this context, the *Evidence for Better Lives Study* (EBLS) aims to produce high-quality  
4 evidence from non-western societies to support effective strategies to reduce violence against  
5 children from pregnancy onwards. It involves an interdisciplinary impact and capacity-building  
6 programme of longitudinal research based in eight cities chosen to reflect the diversity of  
7 cultural, social and economic conditions across the globe. EBLS is an ambitious research  
8 programme developed in four main stages (see Figure 1), including an initial scoping exercise  
9 (December 2015), a feasibility study (October 2016-March 2018), the current foundational  
10 research (July 2018-December 2019) and a full study expected to start in 2020.  
11  
12  
13  
14  
15  
16  
17  
18  
19  
20  
21  
22  
23  
24  
25  
26  
27

28 *FIGURE 1 ABOUT HERE*

29 Four features make EBLS-Foundational Research (FR) a significant advance on previous  
30 studies. First, it recruits pregnant women in the third trimester of pregnancy, measuring  
31 prenatal exposures to violence and other adversities when they are happening and thereby  
32 overcoming the limitations of using retrospective recall (20, 21).  
33  
34  
35  
36  
37  
38  
39

40 Second, the longitudinal design of the study allows researchers to collect information on the  
41 same families over time, a method that is uniquely well placed to illuminate issues that affect  
42 children's development, both in terms of individual and family-level factors, and also higher-  
43 level influences, such as changing policies and social norms related to violence and abuse (22,  
44 23). Longitudinal data collection yields important information on factors which may form part  
45 of the causal chain leading to favourable/unfavourable outcomes. In doing so, they provide  
46 essential evidence for prevention knowledge and policy-making (24-27).  
47  
48  
49  
50  
51  
52  
53  
54  
55  
56  
57  
58  
59  
60



1  
2  
3 Thirdly, EBLS-FR intends to address the lack of longitudinal studies examining violence in  
4 LMICs with analogous sampling and measurement to allow comparisons across locations (28).  
5  
6 Without the comparable methods used for longitudinal data collection in multiple settings, it is  
7  
8 difficult to make cross-cultural comparisons of associations between exposures and outcomes  
9  
10 (29). Furthermore, although it is widely accepted that a foetus is influenced by the environment  
11  
12 from conception and that the period from conception to age 2-3 is critical for development (30),  
13  
14 few cohort studies have started in pregnancy, particularly in LMICs (31).  
15  
16  
17  
18  
19  
20

21 Fourthly, a distinctive component of EBLS-FR is to engage fathers and male partners of the  
22  
23 participants and learn more about how they can be motivated to participate in research. Extant  
24  
25 research has linked father involvement in parenting to a number of crucial child outcomes, such  
26  
27 as better infant cognitive development, more positive relationships with peers, better  
28  
29 psychosocial adjustment as well as greater academic achievement (32). Conversely, psychiatric  
30  
31 disorders and violent behaviour of fathers, both inside and outside the family, can increase the  
32  
33 risk of psychological and developmental difficulties in children (33, 34). Fathers' participation  
34  
35 rates in birth cohort studies have been reported as lower than mothers'; however, birth-cohort  
36  
37 studies have traditionally invested less in the recruitment and retention of fathers (31,35,36).  
38  
39 Hence, EBLS-FR has recruited fathers in two sites, to gain further insight into engaging them  
40  
41 in developmental research as well as to run an initial examination of the fathers' characteristics  
42  
43 and their associations with maternal and child wellbeing.  
44  
45  
46  
47  
48  
49  
50

51 In sum, EBLS will have the potential to influence local and international policies to prevent  
52  
53 exposure to violence. It can also promote cross-site and global learning about how families and  
54  
55 communities in different societies support their children to achieve their full developmental  
56  
57 potential. EBLS-FR serves as a critical step towards generating such evidence for violence  
58  
59  
60

1  
2  
3 prevention by testing rigorous and comparable ways to collect multi-country longitudinal data  
4  
5 starting from pregnancy.  
6  
7  
8  
9

## 10 **Study aims**

11  
12 This protocol outlines the motivation and methods for the EBLS-FR, developed as a pilot to  
13  
14 inform EBLS and examine the key uncertainties in the project design (37, 38). The aims of the  
15  
16 EBLS-FR are:  
17

- 18  
19 1. To develop and test strategies of recruiting pregnant women and following them up  
20  
21 during the perinatal period across eight EBLS-FR sites.  
22
- 23  
24 2. To assess the feasibility of fathers' and male partners' participation in the study.  
25
- 26  
27 3. To test the strategies to collect, manage and analyse comparable high-quality data  
28  
29 across the eight EBLS sites, including questionnaires and biological samples.  
30
- 31  
32 4. To produce initial sample prevalence estimates of key indicators, such as prenatal  
33  
34 exposure to violence, women's levels of well-being, stress, depressive symptoms, pre-  
35  
36 and peri-natal complications, and to describe the characteristics of their male partners.  
37
- 38  
39 5. To explore associations of the key indicators reported by mothers and fathers with  
40  
41 maternal and birth outcomes.  
42
- 43  
44 6. To build and strengthen local research capacity for longitudinal research by  
45  
46 coordinating skill development opportunities and establishing local and international  
47  
48 collaborative networks that include early career researchers.  
49
- 50  
51 7. To enhance engagement with policy makers, community members, and other  
52  
53 stakeholders and ensure that future stages of EBLS are designed to produce relevant  
54  
55 knowledge and strategies to support efforts to address violence against children in all  
56  
57 study sites.  
58  
59  
60

## DESIGN

EBLS-FR is a prospective birth cohort study that targets 1,200 pregnant women (150 in each of eight sites) and 300 fathers (150 in two sites) in different cultural contexts across the world. Measurements are carried out during the third trimester of pregnancy and when the child is aged two to six months. The EBLS-FR protocol for recruitment and collection of data has been approved by the Ethics Boards of all universities involved in the project (see section declarations for more detail).

### Study settings

Participating sites were selected according to the following criteria: i) country status of a low- or middle-income economy, ii) representation of different regions of the world, iii) a political environment receptive to research-based evidence, iv) the presence of local research teams with the expertise and willingness to conduct comparative research and engage in advocacy based on the findings, and v) existing links of the research teams with local prenatal healthcare services to facilitate access to the target sample. In 2017, the participating sites and associated research teams were decided as follows (see Figure 2): Valenzuela (University of the Philippines, Philippines), Hue (Hue University, College of Medicine and Pharmacy, Vietnam), Ragama (University of Kelaniya, Sri Lanka), Tarlai Kalan (Health Services Academy, Pakistan), Cluj-Napoca (Babes-Bolyai University, Romania), Worcester (Universities of Cape Town and Stellenbosch, South Africa), Koforidua (University of Ghana, Ghana), and Kingston (University of the West Indies, Jamaica).

*FIGURE 2 ABOUT HERE*

1  
2  
3 The sites were chosen to reflect the heterogeneity of social and cultural conditions across major  
4 world regions: the Caribbean, Europe, Sub-Saharan Africa, the Indian Subcontinent and South-  
5 East Asia. An overview of several international indices provides an account of such diversity  
6 (See Table 1). For instance, a comparison of the homicide rates in each site (i.e., rate of  
7 intentional homicide per year per 100,000 inhabitants), suggests that while Romania, Sri Lanka  
8 and Vietnam report rates under the global average (6.4 per 100,000 population), Jamaica  
9 displays a rate of violence almost seven times higher than the global average (39). The Gender  
10 Inequality Index (GII) shows that Vietnam and Pakistan report the lowest and the higher rates  
11 of inequalities respectively in reproductive health, education, political representation and  
12 access to the labour market (40). Variation is also observed in other cross-comparative indexes  
13 such as GDP, Crude Birth Rates and percentage of population aged 0-14 years.  
14  
15  
16  
17  
18  
19  
20  
21  
22  
23  
24  
25  
26  
27  
28  
29  
30

31 *TABLE 1 ABOUT HERE*  
32  
33

34 Capturing this diversity across the sites is critical for establishing how similar (and therefore  
35 generalisable and universal) the conditions are that lead to violence against women and  
36 children in different countries, and for demonstrating the consistency of their impact on  
37 children's long-term development. It is also crucial for understanding the cultural, contextual  
38 and policy factors that may lead to differences in risk of violence, and its adverse effects on  
39 child development. The diverse samples also offer opportunities to identify site-specific  
40 features that may be protective (50).  
41  
42  
43  
44  
45  
46  
47  
48  
49  
50  
51

52 **Sampling strategy**  
53

54 Based on the time and resources allocated for this project, the decision was taken to use  
55 convenience sampling of participants within sites – a non-probabilistic strategy that allows a  
56 consecutive selection of participants in order of appearance (51). Since we aim to achieve a  
57  
58  
59  
60

1  
2  
3 sample that involves diverse social backgrounds within the study area, each local team attempts  
4  
5 to target a specific number of private and public prenatal medical services.  
6  
7  
8  
9

## 10 **Study participants**

11  
12 *Pregnant women.* The EBLS-FR sample comprises 150 pregnant women recruited from health  
13  
14 centres in each of the eight sites (N=1,200 total). All women attending check-ups in the selected  
15  
16 clinics/hospitals are eligible if they satisfy the following three criteria: i) in the third trimester  
17  
18 of their pregnancy (i.e., weeks 29-40), ii) aged over 18 when signing the informed consent  
19  
20 form, and iii) having their main residence within the study's defined geographical area.  
21  
22  
23  
24  
25

26  
27 *Fathers.* Due to resource constraints, a sample of 150 fathers is recruited in only two of the  
28  
29 EBLS-FR sites, that is, Sri Lanka and the Philippines (N=300 total). All women who consent  
30  
31 to participate in EBLS-FR in Sri Lanka and the Philippines are asked about the possibility of  
32  
33 their husband or partner participating in the study. To be eligible, fathers need to meet the  
34  
35 following three criteria: i) being the father figure to the baby, although not necessarily the  
36  
37 biological father; ii) aged over 18 when signing the informed consent, and iii) having their  
38  
39 main residence within the study's defined geographical area.  
40  
41  
42  
43

## 44 **Recruitment, screening, consent and incentives**

45  
46 *Recruitment.* Trained female fieldworkers approach pregnant women directly at local health  
47  
48 services during antenatal check-ups. When the direct approach is not feasible, potential  
49  
50 participants are first approached by the treating clinician (e.g., nurse, midwife, obstetrician),  
51  
52 who briefly presents the research project and asks the woman if she is willing to meet with  
53  
54 EBLS-FR representatives. Fathers are invited to take part in the study only if the pregnant  
55  
56 woman provides written consent to their inclusion.  
57  
58  
59  
60

1  
2  
3 *Screening and consent.* Pregnant women and fathers expressing interest in the EBLS-FR are  
4 invited to answer a brief screening questionnaire to establish their eligibility. If eligible, they  
5 are invited to provide written informed consent. Information sheets, consent forms and  
6 questionnaires are translated into the most common languages spoken by the participants. If  
7 the participant cannot read, versions of the information sheet and consent forms are played by  
8 audio recording or read out aloud. As suggested by the World Health Organization's (WHO)  
9 Research Ethics Committee<sup>1</sup>, the consent of participants who cannot write is obtained via  
10 alternative means (e.g., audio recording or participant's thumbprint). The number of eligible  
11 participants who are approached but do not show interest in the study is also recorded, along  
12 with any reasons for non-participation, if provided.  
13  
14  
15  
16  
17  
18  
19  
20  
21  
22  
23  
24  
25  
26  
27

28 When both the woman and her husband/partner participate, they are interviewed separately to  
29 ensure confidentiality (52).  
30  
31  
32  
33  
34

35 *Incentives.* All study participants are offered a token of appreciation. Each local team  
36 determines the specific incentive in consideration of cultural and local expectations, as well as  
37 the corresponding ethical rules. In all cases, the incentive is approximately equivalent to the  
38 hours spent in the study, reimbursed at minimum wage in the site. In addition, participants are  
39 offered a reimbursement of travel expenses to facilitate the access of participants who could be  
40 underrepresented due to difficulties in paying for transport (53, 54).  
41  
42  
43  
44  
45  
46  
47  
48  
49  
50  
51  
52  
53  
54  
55  
56  
57  
58

---

59 <sup>1</sup> [http://www.who.int/rpc/research\\_ethics/Process\\_seeking\\_IF\\_printing.pdf](http://www.who.int/rpc/research_ethics/Process_seeking_IF_printing.pdf)  
60

## Data collection

Data collection has been planned to be implemented from February to December 2019. To ensure comparability of measures across sites (55), the EBLS-FR team has developed a set of standardised questionnaires.

The EBLS questionnaires were first developed in English and then translated into nine different languages<sup>2</sup>. With small modifications, the process of translation has followed the guidelines suggested by the WHO<sup>3</sup>. Only minor adjustments have been made to ensure that measures are relevant in each location (e.g., which ethnicities are recorded).

Data are collected by fieldworkers who have received standardised training covering topics such as recruitment, consent, data collection and storage procedures, principles of research ethics, referral procedures, and management of risk and difficult situations in the field (e.g., participant distress or unsafe situations). Special emphasis has been put on skills and strategies to collect data on violence against women in diverse cross-cultural settings (56). All these topics are also covered in a fieldworker handbook specifically developed for EBLS-FR.

### **Pregnant women: Questionnaires and instruments.**

*Questionnaire.* The questionnaire completed by pregnant women is a mix of Computer-Aided Personal Interviews (CAPI), and Computer-Assisted Self-Interviewing (CASI) for the more sensitive items (i.e., intimate partner violence, adverse childhood experiences and substance use). To facilitate access for expectant mothers with low levels of literacy, Audio-Supported Self-Completion Interviewing (A-CASI) has been programmed.

---

<sup>2</sup> Urdu, Afrikaans, IsiXhosa, Romanian, Filipino (Tagalog), Sinhala, Tamil, Vietnamese and Twi

<sup>3</sup> [http://www.who.int/substance\\_abuse/research\\_tools/translation/en/](http://www.who.int/substance_abuse/research_tools/translation/en/)

1  
2  
3 In EBLS-FR, data from participating women are collected at two time points. The baseline  
4 assessment is completed when the women are in the third trimester of their pregnancy. The  
5 baseline assessment takes approximately 120 minutes, involving the completion of a 210-item  
6 questionnaire and the collection of biological samples. Subsequently, a brief follow-up  
7 assessment is conducted with the mother when the child is at least two months old. The follow-  
8 up assessment takes approximately 20 minutes and involves the completion of a 22-item  
9 questionnaire. It also helps to test the process of re-contacting participants and retaining them  
10 post-birth.  
11  
12  
13  
14  
15  
16  
17  
18  
19  
20  
21  
22

23  
24 *Measures.* Measures for pregnant women include items on demographic factors,  
25 socioeconomic status, prenatal health and reproductive history, adverse childhood experiences,  
26 community and social support, mental health and other psychological traits, as well as prenatal  
27 maternal attachment to the unborn child. The follow-up measures collect data on mothers'  
28 mental health, child well-being and birth memories (see Table 2).  
29  
30  
31  
32  
33  
34  
35  
36  
37

38 Informed by a literature review developed by the EBLS consortium (13), we have identified  
39 salient factors that may relate to the predictors and consequences of exposure to violence in the  
40 perinatal period. For reasons of space, only the main measures used to capture these factors are  
41 described in the following paragraphs.  
42  
43  
44  
45  
46  
47  
48

49 *Prenatal Intimate Partner Violence (p-IPV).* P-IPV is measured using a scale extracted from  
50 the WHO's multi-country study on women's health and domestic violence against women (56).  
51 We use six items to capture physical violence (e.g., I was hit with a fist or something else that  
52 could hurt) four items to measure emotional abuse (e.g., I was insulted or made feel bad about  
53 myself); and three items for sexually abusive behaviours (e.g., I was physically forced to have  
54  
55  
56  
57  
58  
59  
60



1  
2  
3 sexual intercourse when I did not want to). A four-point Likert scale (i.e., never, once, a few  
4 times, many times) allows the participant to report the frequency of exposure to such  
5 experiences over the last six months. Questions have been validated in multi-racial, ethnic  
6 populations and in pregnant women and therefore have appropriate psychometric properties  
7 (57, 58). Exposure to p-IPV is collected using A-CASI as this approach has been demonstrated  
8 to facilitate the disclosure of IPV when compared with face-to-face interviews and self-  
9 administered written screens (59,60).

10  
11  
12  
13  
14  
15  
16  
17  
18  
19  
20  
21  
22 *The Perceived Stress Scale (PSS)*. The PSS, developed by Cohen and Williamson (61), was  
23 designed to measure the degree to which respondents appraise aspects of their own life  
24 experiences as unpredictable, uncontrollable and emotionally overwhelming. The scale  
25 includes 10 items (e.g., feeling one could not cope with all the things that one had to do) and  
26 responses are provided using a four-point Likert scale (i.e., *not at all, several days, more than*  
27 *half the days, nearly every day*). The PSS has superior psychometric properties when used with  
28 a normative population, when compared with alternative scales and also when administered to  
29 pregnant mothers (62, 63).

30  
31  
32  
33  
34  
35  
36  
37  
38  
39  
40  
41  
42 *Hair samples*. Each pregnant woman is asked to provide a sample of hair cut from the posterior  
43 vertex area (where growth rates are least variable), as close as possible to the scalp. Hair  
44 samples produce measures of cortisol concentrations, an index of accumulated stress exposure  
45 validated for use in pregnant women (64). Since each centimetre of hair represents a month's  
46 period of exposure, it is possible to quantify cumulative physiological stress during the second  
47 trimester of pregnancy. Previous research has suggested the second trimester of pregnancy in  
48 particular as a critical period for stress exposure (e.g., 10).

1  
2  
3 *Blood samples.* Dried blood spots are collected by applying a few drops of blood, drawn by  
4 lancet from a finger, onto medical-grade, absorbent filter paper. Blood samples are analysed  
5 for a biomarker of inflammation (C-reactive protein, C-RP). We will relate these biomarkers  
6 to information on violence exposure and maternal outcomes in order to illuminate the  
7 biological mechanisms underpinning the effects of violence and adversity exposure on  
8 maternal and birth outcomes (65-67).  
9  
10  
11  
12  
13  
14  
15

16  
17 *TABLE 2 ABOUT HERE*  
18  
19  
20  
21

22 *Father's questionnaires.* Data are collected using a paper and pencil questionnaire at two  
23 different time points. As in the case of pregnant women, the baseline assessment is completed  
24 during the third trimester of the woman's pregnancy. Interviews take approximately 40  
25 minutes, involving the completion of a 90-item questionnaire. The follow-up assessment  
26 encompasses 37 items to be completed in about 20 minutes.  
27  
28  
29  
30  
31  
32

33  
34  
35 *Measures.* The *father's questionnaire* requests information on demographic factors,  
36 socioeconomic status, adverse childhood experiences, partner support, mental health,  
37 psychological traits and substance use. These items are similar to those used in the mother's  
38 questionnaire. However, the questionnaire for fathers includes some specific items measuring  
39 attitudes to fatherhood, participation in antenatal care visits, and the father's participation in  
40 household activities (89-91). The follow-up assessment asks the participant to complete items  
41 on paternal attitudes, paternal enjoyment and paternal confidence after birth (See Table 3).  
42  
43  
44  
45  
46  
47  
48  
49  
50  
51

52  
53  
54 *TABLE 3 ABOUT HERE*  
55  
56  
57  
58  
59  
60

## Data analysis

Descriptive statistics will include frequency of p-IPV, associations between exposure to violence and the putative outcomes (e.g. C-RP, childbirth weight, maternal mental health). At the same time, candidate mediators and moderators in exposure-outcome associations will be explored. We will conduct measurement invariance analysis and make comparisons on latent variables across the sites. Statistical techniques will thus include linear and generalised linear models, structural equation models and multi-group item response theory and/or factor models. If available, EBLS-FR data will be compared with prevalence in the population. For instance, frequencies of intimate partner violence, perinatal depression and levels of stress or substance use will be compared with the prevalence of the same risk factors in the city's population.

All primary analyses will be pre-registered using open-access resources, such the Open Science Framework (<https://osf.io/>). After a period of embargo, data will be available for the use of the international scientific community. Local stakeholders will be consulted to prioritise additional research questions to be answered with the data.

## Confidentiality and data protection

In EBLS-FR all participants are assigned a numeric identification (ID) code. The personally identifiable data, including contact details, are kept separate from all data collected via questionnaires to ensure confidentiality. EBLS uses a number of technical and organisational measures to maintain security, confidentiality, completeness and integrity of the data associated with the study. This includes adherence to the requirements on collection and processing of personal identifiable data as stipulated by the General Data Protection Regulation (GDPR) EU 2016/679.

### **Data quality and data management**

Multiple strategies are utilised to enhance the quality of data collection. They include training of project workers in the administration of questionnaires, training of clinical and project staff in the measurement of specific indices and validation checks for consistency and completeness of routinely collected data. Lab analyses will be subject to strict quality controls based on established protocols. Data will be screened for out-of-range or otherwise implausible values before finalising the dataset.

### **Organisational structure**

EBLS comprises a consortium of 15 co-investigators who are collectively responsible for conducting the research. Given the multi-disciplinary nature of violence and its impacts on child development, the team includes expertise in disciplines such as developmental psychopathology, paediatrics, criminology, and public health. The organisational structure includes a coordinating team at the University of Cambridge. In each of the sites, a collaborative research team has been established to implement the EBLS-FR study.

## **DISCUSSION**

Ending violence against children and dealing with its consequences requires that we develop a better understanding of the factors that foster child development in various societies and identify the risk factors that need to be addressed most urgently. EBLS is designed to make novel contributions to these key questions by drawing on parallel data collection in eight sites, thus enabling both within- and cross-country analyses. While the experience of conducting the EBLS-FR will illuminate the feasibility of procedures for the next stages, psychometric analyses will provide empirical information on the cross-cultural performance of the study's measures. Analyses of the EBLS-FR data will also provide initial estimates of the levels of

1  
2  
3 exposure to adversity and the relationships between exposures and outcomes, as well as test  
4 potential pathways and moderating factors.  
5  
6  
7  
8  
9

10 Conducting research in multiple regions will allow us to examine how findings generalise  
11 across different socio-cultural and political contexts. To complement participants' reports of  
12 their experiences and behaviours, the study will also include biological data collection to  
13 examine biological pathways related to violence and health. This will allow us to test for the  
14 first time the combined role of systemic inflammation and the HPA axis on mediating the links  
15 between p-IPV and maternal and birth outcomes. It has been argued that highlighting the  
16 biological effects of social issues (such as violence) can be particularly effective in motivating  
17 policy change (e.g.,92). EBLS-FR data collection tools and datasets from eight countries can  
18 also benefit the broader research community working on violence prevention.  
19  
20  
21  
22  
23  
24  
25  
26  
27  
28  
29  
30  
31  
32

33 EBLS-FR has also been designed to foster strategic collaborations and knowledge exchange  
34 and capacity building between researchers, communities and policy makers in order to link  
35 research findings to policy actions. Future stages of EBLS will reveal the extent and  
36 manifestations of exposure to violence in each site; they will identify the salience of risk and  
37 protective factors for different groups and contexts; they will alert decision-makers to the short  
38 and long-term consequences of violence against women and children that are not currently  
39 addressed; and they will establish the essential basis for future actions. Such knowledge  
40 exchange between researchers and governments is essential to establish and evaluate  
41 prevention efforts and report on progress toward SDG violence reduction targets.  
42  
43  
44  
45  
46  
47  
48  
49  
50  
51  
52  
53  
54  
55

56 Conducting a multi-site project poses both research design and management questions of how  
57 to maintain comparability across countries, while also examining relevant issues that are only  
58  
59  
60

1  
2  
3 present in some of the contexts, such as child marriage. As reflected in the organisational  
4 structure of the study, we believe that multi-country, multi-disciplinary projects require both a  
5  
6 strong level of international coordination and collaborating local governance structures.  
7  
8  
9  
10  
11  
12  
13  
14  
15  
16  
17  
18  
19  
20  
21  
22  
23  
24  
25  
26  
27  
28  
29  
30  
31  
32  
33  
34  
35  
36  
37  
38  
39  
40  
41  
42  
43  
44  
45  
46  
47  
48  
49  
50  
51  
52  
53  
54  
55  
56  
57  
58  
59  
60

For peer review only

## REFERENCES

1. Hillis S, Mercy J, Amobi, A, & Kress, H. Global prevalence of past-year violence against children: A systematic review and minimum estimates. *Paediatrics*. 2016; *137*(3), 1–13.
2. Devries K, Watts C, Yoshihama M, Kiss L, Blim, L, Deyessa N, ... Study, W. H. O. M. Violence against women is strongly associated with suicide attempts: Evidence from the WHO multi-country study on women's health and domestic violence against women. *Social Science & Medicine*. 2011; *73*, 79–86. <https://doi.org/10.1016/j.socscimed.2011.05.006>
3. Norman RE, Byambaa M, De R, Butchart A, Scott J, & Vos T. The long-term health consequences of child physical abuse, emotional abuse, and neglect: A systematic review and meta-analysis. *PLoS Medicine*. 2012; *9*(11), 1–31. <https://doi.org/10.1371/journal.pmed.1001349>
4. Donovan, B. M., Spracklen, C. N., Schweizer, M. L., Ryckman, K. K., & Saftlas, A. F. Intimate partner violence during pregnancy and the risk for adverse infant outcomes: A systematic review and meta-analysis. *BJOG: An International Journal of Obstetrics & Gynaecology*, 2016; *123*, 1289–1299.
5. Fang, X., Brown, D. S., Florence, C. S., & Mercy, J. A. (2012). The economic burden of child maltreatment in the United States and implications for prevention. *Child Abuse & Neglect*, *36*(200), 156–165. <http://doi.org/10.1016/j.chiabu.2011.10.006>
6. Fang, X., Fry, D. A., Brown, D. S., Mercy, J. A., Dunne, M. P., Butchart, A. R., ... Swales, D. M. (2015). The burden of child maltreatment in the East Asia and Pacific region. *Child Abuse & Neglect*, *42*(17), 146–162.
7. Betts, K. M., Williams, G. M., Najman, J. M., & Alati, R. A. (2015). The relationship between maternal depressive, anxious, and stress symptoms during pregnancy and adult

- 1  
2  
3 offspring behavioral and emotional problems. *Depression and Anxiety*, 32, 82–90.  
4  
5 <http://doi.org/10.1002/da.22272>  
6  
7
- 8 8. Martinez-Torteya, C., Bogat, G. A., Levendosky, A. A., & Von Eye, A. (2016). The  
9  
10 influence of prenatal intimate partner violence exposure on hypothalamic – pituitary –  
11  
12 adrenal axis reactivity and childhood internalizing and externalizing symptoms.  
13  
14 *Development and Psychopathology*, 28, 55–72.  
15  
16 <http://doi.org/10.1017/S0954579415000280>  
17  
18
- 19 9. Moffitt, T. E., & Klaus-Grawe 2012 Think Tank. (2013). Childhood exposure to  
20  
21 violence and lifelong health: Clinical intervention science and stress biology research  
22  
23 join forces. *Developmental Psychopathology.*, 25(402), 1–28.  
24  
25 <http://doi.org/10.1017/S0954579413000801.Childhood>  
26  
27
- 28 10. Monk C, Georgieff MK, & Osterholm EA. Maternal prenatal distress and poor nutrition  
29  
30 - mutually influencing risk factors affecting infant neurocognitive development. *J Child*  
31  
32 *Psychol Psychiatry*. 2013; 54(2), 115–130.  
33  
34 <https://doi.org/10.1111/jcpp.12000.Maternal>  
35  
36
- 37 11. Han, A., and Stewart, D. E. Maternal and fetal outcomes of intimate partner violence  
38  
39 associated with pregnancy in the Latin American and Caribbean region. *Int. J.*  
40  
41 *Gynaecol. Obstet.* 2014; 124, 6–11. doi: 10.1016/j.ijgo.2013.06.037  
42  
43
- 44 12. Weaver, I. C. G., Cervoni, N., Champagne, F. A., D’Alessio, A. C., Sharma, S., Seckl,  
45  
46 J. R., ... Meaney, M. J. (2004). Epigenetic programming by maternal behavior. *Nature*  
47  
48 *Neuroscience*, 7, 847. Retrieved from <https://doi.org/10.1038/nn1276>  
49  
50
- 51 13. Murray AL, Kaiser D, Valdebenito S, Hughes C, Baban A, Fernando AD, ... Eisner M.  
52  
53 The Intergenerational Effects of Intimate Partner Violence in Pregnancy: Mediating  
54  
55 Pathways and Implications for Prevention. *Trauma, Violence, & Abuse*. 2018;  
56  
57 <https://doi.org/10.1177/1524838018813563>  
58  
59  
60



- 1  
2  
3  
4  
5  
6  
7  
8  
9  
10  
11  
12  
13  
14  
15  
16  
17  
18  
19  
20  
21  
22  
23  
24  
25  
26  
27  
28  
29  
30  
31  
32  
33  
34  
35  
36  
37  
38  
39  
40  
41  
42  
43  
44  
45  
46  
47  
48  
49  
50  
51  
52  
53  
54  
55  
56  
57  
58  
59  
60
14. Ohl, F., Michaelis, T., Vollmann-Honsdorf, G. K., Kirschbaum, C., & Fuchs, E. (2000). Effect of chronic psychosocial stress and long-term cortisol treatment on hippocampus-mediated memory and hippocampal volume: A pilot-study in tree shrews. *Psychoneuroendocrinology*, 25(4), 357–363.
  15. Eisner M, Nivette A, Louise A, & Krisch M. Achieving population-level violence declines: Implications of the international crime drop for prevention programming. *Journal of Public Health Policy*. 2016; 37(S1), 66–80. <https://doi.org/10.1057/s41271-016-0004-5>
  16. Averdijk M, Eisner M, Luciano E, Valdebenito S, & Obsuth I. *Wirksame gewaltprävention. Eine übersicht zum internationalen wissensstand*. 2014. Retrieved from [https://www.npgrsp.ch/fileadmin/npgrsp/Themen/Averdijk\\_2014\\_Gewaltpraevention\\_UEbersicht.pdf](https://www.npgrsp.ch/fileadmin/npgrsp/Themen/Averdijk_2014_Gewaltpraevention_UEbersicht.pdf)
  17. World Health Organization. Violence prevention. The evidence. *Series of Briefings on Violence Prevention. Geneva, Switzerland*. 2010; 1–127.
  18. Fernald LCH, Kariger P, Engle P, & Raikes A. Examining early child development in low-income countries: A toolkit for the assessment of children in the first five years of life. *The World Bank*. 2009; 1–210.
  19. Hillis S, Mercy J, Amobi, A, & Kress, H. Global prevalence of past-year violence against children: A systematic review and minimum estimates. *Paediatrics*. 2016; 137(3), 1–13.
  20. Hardt J, Rutter M. Validity of adult retrospective reports of adverse childhood experiences: review of the evidence. *J Child Psychol Psychiatry*. 2004; 45: 260–73
  21. Boeke CE, Marín C, Oliveros H. et al. Validity of Maternal Birthweight Recall Among Colombian Children. *Matern Child Health J*. 2012; 16: 753.

- 1  
2  
3 <https://doi.org/10.1007/s10995-011-0803-z>  
4  
5  
6 22. Dunn K, & Banati P. *Strength in numbers. How longitudinal research can support child*  
7 *development*. Florence; 2015.  
8  
9  
10 23. Young Lives. What can comparative country research tell us about child poverty?  
11 (May), 2–3. 2017. Retrieved from  
12 [http://younglives.org.uk/sites/www.younglives.org.uk/files/YL-MethodsGuide-](http://younglives.org.uk/sites/www.younglives.org.uk/files/YL-MethodsGuide-WhyFourCountries.pdf)  
13 [WhyFourCountries.pdf](http://younglives.org.uk/sites/www.younglives.org.uk/files/YL-MethodsGuide-WhyFourCountries.pdf)  
14  
15  
16  
17  
18 24. ESRC. ESRC longitudinal studies review 2017. Paper 2: The policy relevance of  
19 longitudinal studies- contributions and barriers. 2017. Retrieved from:  
20 [http://www.esrc.ac.uk/files/news-events-and-publications/publications/paper-2-](http://www.esrc.ac.uk/files/news-events-and-publications/publications/paper-2-longitudinal-studies-and-policy-contributions-and-barriers/)  
21 [longitudinal-studies-and-policy-contributions-and-barriers/](http://www.esrc.ac.uk/files/news-events-and-publications/publications/paper-2-longitudinal-studies-and-policy-contributions-and-barriers/)  
22  
23  
24  
25  
26  
27  
28 25. Golding J, Jones R, Bruné MN, & Pronczuk J. Why carry out a longitudinal birth  
29 survey?. *Paediatric and perinatal epidemiology*. 2009; 23(s1), 1-14.  
30  
31  
32  
33 26. McCaw-Binns A, Ashley D, & Samms-Vaughan M. Impact of the Jamaican birth  
34 cohort study on maternal, child and adolescent health policy and practice. *Paediatric*  
35 *and perinatal epidemiology*. 2010; 24(1), 3-11.  
36  
37  
38  
39  
40 27. Samms-Vaughan M. Comprehensive longitudinal studies of child health, development  
41 and behaviour in Jamaica: Findings and policy impact. *West Indian Medical Journal*.  
42 2008; 57(6), 639–644.  
43  
44  
45  
46  
47 28. Murray J, Shenderovich Y, Gardner F, Mikton C, Derzon JH, Liu J, & Eisner M. Risk  
48 factors for antisocial behavior in low- and middle-income countries: A systematic  
49 review of longitudinal studies. *Crime and Justice*; 2008.  
50  
51  
52  
53  
54 29. Abramsky T, Watts CH, Garcia-Moreno C, Devries K, Kiss L, Ellsberg M, ... Heise L.  
55 What factors are associated with recent intimate partner violence? findings from the  
56 WHO Multi-country Study on women's Health and Domestic Violence. BMC Public  
57  
58  
59  
60

- 1  
2  
3 Health. 2011; 11. <https://doi.org/10.1186/1471-2458-11-109>  
4  
5  
6 30. Daelmans B, Darmstadt GL, Lombardi J, Black MM, Britto PR., Lye S, ... Richter LM.  
7  
8 Early childhood development: the foundation of sustainable development. *The Lancet*.  
9  
10 2017; 389(10064), 9–11. [https://doi.org/10.1016/S0140-6736\(16\)31659-2](https://doi.org/10.1016/S0140-6736(16)31659-2)  
11  
12  
13 31. Kiernan K. Fathers and partners in national and international birth cohort studies. *Life*  
14  
15 *Study Expert Advisory Group on Fathers and Partners*. 2014, 1–23.  
16  
17 32. Wong JJ, Roubinov DS, Gonzales NA, & Millsap RE. Father enrolment and  
18  
19 participation in a parenting intervention: Personal and contextual predictors. *Fam*  
20  
21 *Process*. 2003; 52(3), 440–454. <https://doi.org/10.1111/famp.12024.Father>  
22  
23  
24 33. Ramchandani P, & Psychogiou L. Paternal psychiatric disorders and children's  
25  
26 psychosocial development. *Lancet*. 2009; 374, 646–653.  
27  
28 [https://doi.org/10.1016/S0140-6736\(09\)60238-5](https://doi.org/10.1016/S0140-6736(09)60238-5)  
29  
30  
31 34. Hughes C, Devine RT, Mesman J, Blair C, & Team N. Parental well-being, couple  
32  
33 relationship quality, and children's behavioral problems in the first 2 years of life.  
34  
35 *Development and Psychopathology*. 2019; 1–10.  
36  
37 <https://doi.org/10.1017/S0954579419000804>  
38  
39  
40 35. Cabrera NJ, Volling BL, & Barr R. Fathers Are Parents, Too! Widening the Lens on  
41  
42 Parenting for Children's Development. *Child Development Perspectives*. 2018; 12(3),  
43  
44 152–157. <https://doi.org/10.1111/cdep.12275>  
45  
46  
47 36. Phares V, Fields S, Kamboukos D, & Lopez E. Still Looking for Poppa. *American*  
48  
49 *Psychologist*. 2005; 127(October), 735–736. [https://doi.org/10.1037/0003-](https://doi.org/10.1037/0003-066X.60.7.735)  
50  
51 [066X.60.7.735](https://doi.org/10.1037/0003-066X.60.7.735)  
52  
53  
54 37. Craig P, Dieppe P, Macintyre S, Michie S, Nazareth I, & Petticrew M. Developing and  
55  
56 evaluating complex interventions: The new Medical Research Council guidance. *BMJ*.  
57  
58 2008; 337, 1–6. <https://doi.org/10.1136/bmj.a1655>  
59  
60

- 1  
2  
3 38. Shader R. Note Proof of Feasibility: What a Pilot Study Is and Is Not. *Clinical*  
4  
5 *Therapeutics*. 2015; 37(7), 1379–1380. <https://doi.org/10.1016/j.clinthera.2015.06.011>  
6  
7  
8 39. World Health Organization. *World health statistics 2018: Monitoring health for the*  
9  
10 *SDGs, sustainable development goals*. Geneva; 2018.  
11  
12 40. United Nations. Human development indices and indicators: 2018 statistical update.  
13  
14 *United Nations Development Programme*, i–112. 2018. Retrieved from  
15 [http://hdr.undp.org/sites/default/files/hdr2018\\_technical\\_notes.pdf](http://hdr.undp.org/sites/default/files/hdr2018_technical_notes.pdf)  
16  
17  
18 41. World Health Organization. *World health statistics 2018: Monitoring health for the*  
19  
20 *SDGs, sustainable development goals*. Geneva; 2018.  
21  
22  
23 42. United Nations. Human development indices and indicators: 2018 statistical update.  
24  
25 *United Nations Development Programme*, i–112. 2018. Retrieved from  
26 [http://hdr.undp.org/sites/default/files/hdr2018\\_technical\\_notes.pdf](http://hdr.undp.org/sites/default/files/hdr2018_technical_notes.pdf)  
27  
28  
29 43. World Bank. GDP per capita, PPP (current international \$) 2017-2018. (2018b).  
30  
31 Retrieved from  
32 <https://data.worldbank.org/indicator/NY.GDP.PCAP.PP.CD?locations=1W-AF>  
33  
34  
35 44. World Bank. Crude birth rated. (2018a).  
36  
37  
38 45. World Bank. Population ages 0-14 (% of total population). (2018c).  
39  
40  
41 46. Bureau of Statistics Punjab, Planning & Development Board, G. of the P. *Multiple*  
42  
43 *Indicator Cluster Survey Punjab, 2017-18, Survey Findings Report*. Lahore, Pakistan.  
44  
45 2017. Retrieved from <https://bos.punjab.gov.pk/system/files/MICS>  
46  
47 <https://bos.punjab.gov.pk/system/files/MICS>  
48 [SFR\\_Final\\_Vol2\\_0.pdf](https://bos.punjab.gov.pk/system/files/MICS)  
49  
50  
51 47. General Statistics Office and UNICEF. *Viet Nam Multiple Indicator Cluster Survey*  
52  
53 *2014. Monitoring the situation of children and women*. 2015. Ha Noi, Viet Nam.  
54  
55  
56 48. Ghana Statistical Service. *Ghana Multiple Indicator Cluster Survey with an Enhanced*  
57  
58 *Malaria Module and Biomarker 2011. Final Report*. Accra, Ghana. 2011. Retrieved  
59  
60

- 1  
2  
3 from <https://dhsprogram.com/pubs/pdf/FR262/FR262.pdf>  
4  
5  
6 49. Statistical Institute of Jamaica. *Jamaica Multiple Indicator Cluster Survey 2005*.  
7  
8 Kingston, Jamaica. 2007. Retrieved from <http://statinja.gov.jm/Publication/Mics>  
9  
10 [Report.pdf](#)  
11  
12  
13 50. Morrow, V. What Can Comparative Country Research Tell Us About Child Poverty?  
14  
15 *Young Lives Methods Guide*. 2015 (June);1–2.  
16  
17 51. Martínez-Mesa J, Pereira Duquia R, Bastos JL, González-Chica DA, & Rangel  
18  
19 Bonamigo R. . Sampling: how to select participants in my research study? *An Bras*  
20  
21 *Dermatol*. 2016; 91(3), 326–330.  
22  
23  
24 52. Rabel BV, Cunningham SA, & Stephenson R. Interview Interruption and Responses to  
25  
26 Questions About Domestic Violence in India. *Violence Against Women*. 2014; 20(8),  
27  
28 937–947. <https://doi.org/10.1177/1077801214546905>  
29  
30  
31 53. Abshire M, Dinglas VD, Cajita MIA, Eakin MN, Needham DM, & Himmelfarb CD.  
32  
33 Participant retention practices in longitudinal clinical research studies with high  
34  
35 retention rates. *BMC Medical Research Methodology*. 2017; 17(30), 1–10.  
36  
37 <https://doi.org/10.1186/s12874-017-0310-z>  
38  
39  
40 54. Laurie H, & Lynn P. The use of respondent incentives on longitudinal surveys. *ISER*  
41  
42 *Working Papers Series*. 2008; 42, 1–32.  
43  
44  
45 55. Gjersing L, Caplehorn JRM, & Clausen T. Cross-cultural adaptation of research  
46  
47 instruments: language, setting, time and statistical considerations. *BMC Medical*  
48  
49 *Research Methodology*. 2010; 10(13), 1–10.  
50  
51  
52 56. García-Moreno C, Jansen HAFM, Ellsberg M, Heise L, & Watts CH. WHO Multi-  
53  
54 country Study on Women’s Health and Domestic Violence Against Women. Initial  
55  
56 results on prevalence, health outcomes and women’s responses. *World Health*  
57  
58 *Organisation*; 2005.  
59  
60

- 1  
2  
3 57. Garcia-Moreno C, Jansen HAFM, Ellsberg M, Heise L, & Watts CH. Prevalence of  
4 intimate partner violence: Findings from the WHO multi-country study on women's  
5 health and domestic violence. *Lancet*. 2006; 368, 1260–1269.  
6  
7  
8  
9  
10 58. Pallitto CC, García-moreno C, Jansen HAFM., Heise L, Ellsberg M, & Watts C.  
11 Intimate partner violence, abortion, and unintended pregnancy: Results from the WHO  
12 Multi-country Study on Women's Health and Domestic Violence. *International*  
13 *Journal of Gynecology and Obstetrics*. 2013; 120, 3–9.  
14  
15  
16  
17  
18 59. Fincher D, Vanderende K, Colbert K, Houry D, Smith LS., & Yount KM. (2015). Effect  
19 of Face-to- Face Interview Versus Interview on Disclosure of Intimate Partner Violence  
20 Among African American Women in WIC Clinics. *Journal of Interpersonal Violence*.  
21 2015; 30(5), 818–838. <https://doi.org/10.1177/0886260514536280>  
22  
23  
24  
25  
26  
27  
28 60. Hussain N, Sprague S, Madden K, Hussain FN., Pindiprolu B, & Bhandari M. A  
29 Comparison of the Types of Screening Tool Administration Methods Used for the  
30 Detection of Intimate Partner Violence: A Systematic Review and Meta-Analysis.  
31 *Trauma, Violence & Abuse*. 2015; 16(1), 60–69.  
32 <https://doi.org/10.1177/1524838013515759>  
33  
34  
35  
36  
37  
38  
39 61. Cohen S, & Williamson G. Perceived stress in a probability sample of the United States.  
40 In S. Spacapan & S. Oskamp (Eds.), *The social psychology of health*. California:  
41 Newbury Park; 1988.  
42  
43  
44  
45  
46 62. Robinson AM., Benzies KM., Cairns SL., Fung T, & Tough SC. Who is distressed? A  
47 comparison of psychosocial stress in pregnancy across seven ethnicities. *BMC*  
48 *Pregnancy and Childbirth*. 2016; 16(215), 1–11. [https://doi.org/10.1186/s12884-016-](https://doi.org/10.1186/s12884-016-1015-8)  
49 [1015-8](https://doi.org/10.1186/s12884-016-1015-8)  
50  
51  
52  
53  
54  
55 63. Solivan AE, Xiong X, Harville EW, & Buekens P. (2015). Measurement of Perceived  
56 Stress Among Pregnant Women: A Comparison of Two Different Instruments.  
57  
58  
59  
60

- 1  
2  
3 *Maternal and Child Health Journal*. 2015; 19, 1910–1915.  
4  
5 <https://doi.org/10.1007/s10995-015-1710-5>  
6  
7
- 8 64. Scharlau F, Pietzner D, Vogel M, Gaudl A, Ceglarek U, Thiery J, ... Wieland K.  
9  
10 Evaluation of hair cortisol and cortisone change during pregnancy and the association  
11 with self- reported depression, somatization, and stress symptoms. *Stress*. 2017; 1–8.  
12  
13 <https://doi.org/10.1080/10253890.2017.1392507>  
14  
15
- 16 65. Zhang J, Luo W, Huang P, Peng L, & Huang Q. Maternal C-reactive protein and  
17 cytokine levels during pregnancy and the risk of selected neuropsychiatric disorders in  
18 offspring: A systematic review and meta-analysis. *Journal of Psychiatric Research*.  
19 2018; 105(April), 86–94. <https://doi.org/10.1016/j.jpsychires.2018.09.002>  
20  
21  
22  
23  
24  
25
- 26 66. Brindle E, Fujita M, Shofer J, & Connor KAO. Serum, plasma, and dried blood spot  
27 high-sensitivity C-reactive protein enzyme immunoassay for population research.  
28 *Journal of Immunological Methods*. 2010; 362(1–2), 112–120.  
29  
30  
31 <https://doi.org/10.1016/j.jim.2010.09.014>  
32  
33  
34
- 35 67. Meier-ewert HK, Ridker PM, Rifai N, Price N, Dinges DF, & Mullington JM. Absence  
36 of Diurnal Variation of C-Reactive Protein Concentrations in Healthy Human Subjects.  
37 2001; 430, 426–430.  
38  
39  
40  
41
- 42 68. ICF. Demographic and Health Survey Interviewer’s Manual. Rockville, Maryland,  
43 U.S.A.: ICF; 2017(June).  
44  
45  
46
- 47 69. Adler NE, Epel, ES, Castellazzo G, & Ickovics JR. Relationship of subjective and  
48 objective social status with psychological and physiological functioning: Preliminary  
49 data in healthy white women. *Health Psychology*. 2000; 19(6), 586–592.  
50  
51  
52  
53
- 54 70. South Asian Birth Cohort Mother Baseline Questionnaire. 2012. Retrieved from:  
55 [http://southasianbirthcohort.com/cms/Media/file/START\\_Mother\\_Baseline\\_Questionnaire.pdf](http://southasianbirthcohort.com/cms/Media/file/START_Mother_Baseline_Questionnaire.pdf)  
56  
57  
58  
59  
60

- 1  
2  
3 71. University of London, Institute of Education, Centre for Longitudinal  
4  
5  
6  
7  
8  
9  
10  
11  
12  
13  
14  
15  
16  
17  
18  
19  
20  
21  
22  
23  
24  
25  
26  
27  
28  
29  
30  
31  
32  
33  
34  
35  
36  
37  
38  
39  
40  
41  
42  
43  
44  
45  
46  
47  
48  
49  
50  
51  
52  
53  
54  
55  
56  
57  
58  
59  
60
71. University of London, Institute of Education, Centre for Longitudinal Studies. *Millennium Cohort Study: First Survey, 2001-2003*. [data collection]. *12th Edition*. UK Data Service. SN: 4683. 2017. <http://doi.org/10.5255/UKDA-SN-4683-4>
72. Deater-Deckard K, Lansford JE, Dodge KA, & Bates JE. The Development of Attitudes About Physical Punishment: An 8- Year Longitudinal Study. *J Fam Psychol*. 2003; *17*(3), 351–360. <https://doi.org/10.1037/0893-3200.17.3.351>.The
73. Sampson RJ, Raudenbush SW, & Earls F. Neighbourhoods and violent crime: A multilevel study of collective efficacy. *Science*. 1997; *277*(15), 918–924.
74. World Health Organization, W. Adverse Childhood Experiences International Questionnaire ( ACE-IQ ). Retrieved from World Health Organization. (2016). *INSPIRE. Seven Strategies for Ending Violence Against Children*. 2018. Retrieved from <https://apps.who.int/iris/bitstream/handle/10665/207717/9789241565356-eng.pdf?sequence=1>
75. Goldberg JS, & Carlson MJ. Parents' relationship quality and children's behavior in stable married and cohabiting families. *Journal of Marriage and Family*. 2004; *76*, 762–777. <https://doi.org/10.1111/jomf.12120>
76. Zimet GD, Dahlem NW, Zimet SG, & Farley GK. The Multidimensional Scale of Perceived Social Support. *Journal of Personality Assessment*. 1988. *52*(1), 30–41. <https://doi.org/10.1207/s15327752jpa5201>
77. Winther-Topp C, Dinesen-Østergaard S, Søndergaard S, & Bech P. The WHO-5 Well-Being Index : A Systematic Review of the Literature. *Psychotherapy and Psychosomatics*. 2015; *84*, 167–176. <https://doi.org/10.1159/000376585>
78. Kroenke K, Spitzer RL, & Williams JBW. The PHQ-9. *J Gen Intern Med*, *16*, 606–613.



- 1  
2  
3 79. Osman, A., Bagge, C, Gutierrez, P, Konick, L, Kopper, B, & Barrios F. (2001). The  
4 suicidal behaviours questionnaire revised (SBQ-R): Validation with clinical and  
5 nonclinical samples. *Assessment*. 2001; 8(4), 443–454.  
6  
7  
8  
9  
10 80. Cohen S. Perceived stress scale. *Mindgarden*. 1994; 1–5.  
11  
12 81. Webster GD, Dewall CN, Pond RS Jr, Deckman, T, Jonason, PK, Le BM, ... Bator RJ.  
13 The Brief Aggression Questionnaire: Psychometric and behavioral evidence for an  
14 efficient measure of trait aggression. *Aggressive Behavior*. 2014; 40, 120–139.  
15 <https://doi.org/10.1002/ab.21507>  
16  
17  
18  
19  
20 82. Van de Glind G, Van den Brink W, Koeter MW, Carpentier P, Van Emmerik-van  
21 Oortmerssen K., Kaye S, ... IASP Research Group. Validity of the Adult ADHD Self-  
22 Report Scale (ASRS) as a screener for adult ADHD in treatment seeking substance use  
23 disorder patients. *Drug Alcohol Depend*. 2013; 1(132), 587–596.  
24 <https://doi.org/10.1016/j.drugalcdep.2013.04.010.Validity>  
25  
26  
27  
28  
29  
30 83. Maloney PW, Grawitch MJ, & Barber LK. The multi-factor structure of the Brief Self-  
31 Control Scale: Discriminant validity of restraint and impulsivity. *Journal of Research*  
32 *in Personality*. 2012; 46, 111–115. <https://doi.org/10.1016/j.jrp.2011.10.001>  
33  
34  
35  
36  
37  
38  
39 84. WHO ASSIST Working Group. The Alcohol, Smoking and Substance Involvement  
40 Screening Test (ASSIST): development, reliability and feasibility. *Addiction*. 2002; 97,  
41 1183–1194.  
42  
43  
44  
45  
46 85. Pallant JF, Haines HM., Hildingsson I, Cross M, & Rubertsson C. Psychometric  
47 evaluation and refinement of the Prenatal Attachment Inventory. *Journal of*  
48 *Reproductive and Infant Psychology*. 2014; 32(2), 112–125.  
49 <https://doi.org/10.1080/02646838.2013.871627>  
50  
51  
52  
53  
54  
55  
56  
57  
58  
59  
60

- 1  
2  
3 86. Magnus P, Irgens LM, Haug K, Nystad W, & Skjærven R. Cohort profile: The  
4 Norwegian Mother and Child Cohort Study (MoBa). *International*. 2006; 35, 1146–  
5 1150. <https://doi.org/10.1093/ije/dyl170>  
6  
7  
8  
9  
10 87. UNICEF/WHO. Questionnaire for Breastfeeding Mother. *BFHI Section 4: Hospital*  
11 *Self-Appraisal and Monitoring*. 2009; 64–66.  
12  
13  
14 88. Foley S, Crawley R, Wilkie S, & Ayers S. The Birth Memories and Recall  
15 Questionnaire (BirthMARQ): Development and evaluation. *BMC Pregnancy &*  
16 *Childbirth*. 2014; 14, 15–20.  
17  
18  
19  
20 89. Scourfield J, Culpin I, Gunnell D, Dale C, Joinson C, Heron J, & Collin SM. The  
21 association between characteristics of fathering in infancy and depressive symptoms in  
22 adolescence: A UK birth cohort study. *Child Abuse and Neglect*. 2016; 58, 119–128.  
23  
24  
25  
26  
27  
28  
29  
30  
31 90. Davis J, Vyankandondera J, Luchters S, Simon D, & Holmes W. Male involvement in  
32 reproductive, maternal and child health: A qualitative study of policymaker and  
33 practitioner perspectives in the Pacific. *Reproductive Health*. 2016; 13(1), 1–11.  
34  
35  
36  
37  
38  
39  
40 91. Davis J, Vaughan C, Nankinga J, Davidson L, Kigodi H, Alalo E, ... Luchters S.  
41 Expectant fathers' participation in antenatal care services in Papua New Guinea: A  
42 qualitative inquiry. *BMC Pregnancy and Childbirth*. 2018; 18(1), 1–13.  
43  
44  
45  
46  
47  
48  
49 92. McDade TW, Williams S, & Snodgrass JJ. What a drop can do: Dried blood spots as a  
50 minimally invasive method for integrating biomarkers into population-based research.  
51  
52  
53  
54  
55  
56  
57  
58  
59  
60

## DECLARATIONS

### Ethics approval and consent to participate

The EBLS protocol for recruitment and collection of data has been approved by the following ethics boards:

University of Cambridge, School of Social Sciences (18/180) and the Human Biology Research Ethics Committee (HBREC.2018.27)

University of the Philippines Manila – Research Ethics Board, UPMREB 2018-558-01

The Institutional Ethics Committee of Hue University of Medicine and Pharmacy, Vietnam, H2018/430

Faculty of Medicine, University of Kelaniya, Sri Lanka - Ethics Review Committee P/208/11/2018

National Bioethics Committee (NBC) Pakistan, 4-87/NBC-364/19/1487

Consiliul Stiintific – Universitatea Babes-Bolyai, Romania, 18.362/11.10.2018

*University of Cape Town Department of Health, Western Cape Government, South Africa, WC\_201911\_009*

Health Impact Assessment – Western Cape Government

Faculty of Health Sciences, University of Cape Town, South Africa. Human Research Ethics Committee, 057/2019.

Health Research Ethics Committee (HREC) at *Stellenbosch University, South Africa, N18/09/099*

Ghana Health Service Ethics Review Committee, GHS-ERC008/11/18

University of the West Indies Ethics Committee, Jamaica, ECP 212, 17/18

### **Consent for publication**

Not applicable.

### **Availability of data and material**

Not applicable.

### **Competing interests**

The authors have no financial interests related to the findings reported in this protocol.

### **Funding**

The work of the Evidence for Better Lives Study was supported by the Jacobs Foundation, UBS Optimus Foundation, Fondation Botnar, the Consuelo Zobel Alger Foundation, the British Academy, the Cambridge Humanities Research Grants Scheme, the ESRC Impact Acceleration Account Programme, the Queensland University Postgraduate Research Award, the Higher Degree Research Student Supplementary Research Funding from Queensland University of Technology, the University of Edinburgh College Office for the College of Arts, the Humanities and Social Sciences *SFC ODA* Global Challenges Internal Fund, the University of Cambridge GCRF Quality Research Fund, and the Wolfson Professor of Criminology Discretionary Fund. The views expressed are those of the authors and not necessarily those of the founders.

### **Authors' contributions**

Sara Valdebenito helped to plan the methods for EBLS-FR, drafted the paper, and took the lead in revisions.

Aja Louise Murray, Claire Hughes, Adriana Baban, Asvini D. Fernando, Bernadette Madrid, Catherine L. Ward, Joseph Osafo, Michael P. Dunne, Siham Sikander, Susan Walker, Vo Van

1  
2  
3 Thang, Mark Tomlinson, Pasco Fearon, Marguerite Marlow and Diana Taut helped to plan the  
4 methods, reviewed multiple drafts of the paper, and approved the final version submitted.  
5  
6

7  
8 Deshanie Chathurika helped to develop the father questionnaire, reviewed multiple drafts of  
9 the paper, and approved the final version submitted.  
10  
11

12 Yulia Shenderovich helped to draft some sections of the paper and contributed with the  
13 revisions.  
14  
15

16  
17 Manuel Eisner is the principal investigator, he articulated the scientific bases of the study,  
18 reviewed multiple drafts of the paper, and approved the final version submitted.  
19  
20  
21  
22

### 23 **Acknowledgements**

24  
25  
26 Special thanks go to the field staff for their amazing work and also to the mothers and fathers  
27 across the sites who kindly contributed to make EBLS-FR possible. Gratitude also goes to the  
28 medical staff involved in the recruitment of participants.  
29  
30  
31

32  
33 Thanks to the coordination team in Cambridge for their support throughout the EBLS-FR.  
34  
35  
36  
37  
38  
39  
40  
41  
42  
43  
44  
45  
46  
47  
48  
49  
50  
51  
52  
53  
54  
55  
56  
57  
58  
59  
60

**FIGURES**

Figure 1. The four main stages of Evidence for Better Lives

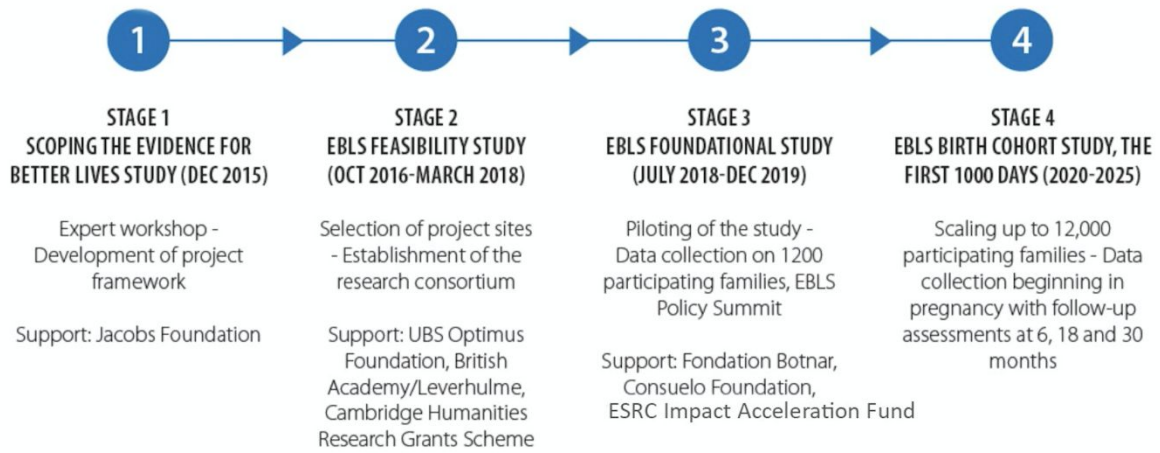

Figure 2. Evidence for Better Lives study sites

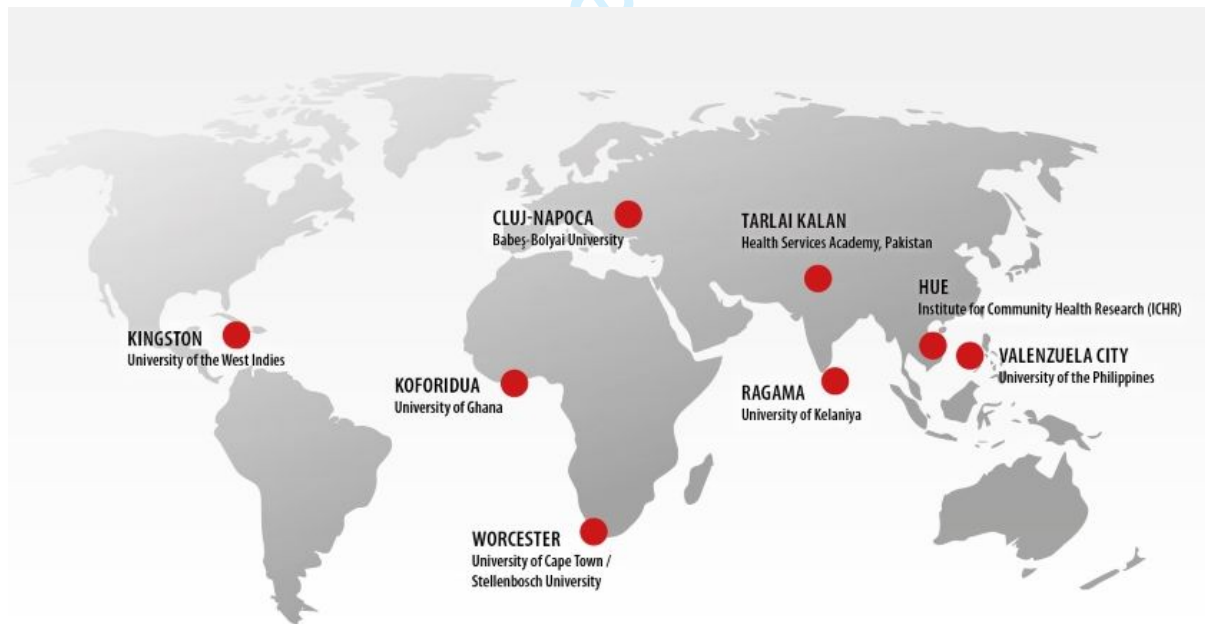

1  
2  
3  
4  
5  
6  
7  
8  
9  
10  
11  
12  
13  
14  
15  
16  
17  
18  
19  
20  
21  
22  
23  
24  
25  
26  
27  
28  
29  
30  
31  
32  
33  
34  
35  
36  
37  
38  
39  
40  
41  
42  
43  
44  
45  
46  
47  
48  
49  
50  
51  
52  
53  
54  
55  
56  
57  
58  
59  
60

## TABLES

Table 1. EBLS sites: Selected country indicators

|              | Homicide rates <sup>a</sup> | Gender Inequality Index <sup>b</sup> | GDP in \$ (PPP) <sup>c</sup> | Crude birth rate <sup>d</sup> | % Population aged 0-14 <sup>e</sup> |
|--------------|-----------------------------|--------------------------------------|------------------------------|-------------------------------|-------------------------------------|
| Philippines  | 14.8                        | .427                                 | 8,935.3                      | 23                            | 32%                                 |
| Vietnam      | 3.8                         | .304                                 | 7,434.77                     | 17                            | 23%                                 |
| Sri Lanka    | 3.0                         | .354                                 | 13,449.99                    | 15                            | 24%                                 |
| Pakistan     | 9.6                         | .541                                 | 5,543.99                     | 28                            | 35%                                 |
| Romania      | 1.6                         | .311                                 | 26,595.44                    | 10                            | 15%                                 |
| South Africa | 33.1                        | .389                                 | 13,661.44                    | 21                            | 29%                                 |
| Ghana        | 9.7                         | .538                                 | 4,738738.3                   | 31                            | 39%                                 |
| Jamaica      | 39.1                        | .412                                 | 9,298.88                     | 16                            | 23%                                 |
| Global       | 6.4                         | .441                                 | 17,971.072                   | 19                            | 26%                                 |

Sources: a. (41); b.(42); c. (43); d. (44); e. (45); f. (46); (47); (48); (49).

Table 2. EBLS-FR measures for mother's questionnaire

| Measures                              | Sources                                                                                    | N° Items | Phase                  | Data collection strategy |
|---------------------------------------|--------------------------------------------------------------------------------------------|----------|------------------------|--------------------------|
| Demographics                          | DHS (68)<br>MacArthur Scale of subjective social status (69)                               | 27       | Baseline               | CAPI                     |
| Prenatal health                       | Adapted from:<br>The South Asian Birth Cohort (START) (70)<br>Millennium Cohort Study (71) | 20       | Baseline               | CAPI                     |
| Attitudes towards physical punishment | Attitudes towards spanking (72)                                                            | 5        | Baseline               | CAPI                     |
| Community characteristics             | Community characteristics scale – Adapted (73)                                             | 20       | Baseline               | CAPI                     |
| Adverse childhood experiences         | WHO 2009, International ACE-IQ Questionnaire Adapted version (74)                          | 19       | Baseline               | A-CASI                   |
| Intimate partner violence             | WHO Multi-country Study on Women Health and Domestic Violence against Women (56)           | 13       | Baseline               | A-CASI                   |
| Partner supportiveness                | Partner supportiveness/ relationship scale (75)                                            | 4        | Baseline               | CAPI                     |
| Social support                        | Social support scale (76)                                                                  | 13       | Baseline               | CAPI                     |
| Wellbeing                             | WHO-5 Well-Being Index (77)                                                                | 5        | Baseline               | CAPI                     |
| Depression                            | PHQ9 (78)                                                                                  | 9        | Baseline and follow-up | CAPI                     |
| Suicidality                           | Suicidality item (79)                                                                      | 1        | Baseline               | CAPI                     |

|                                |                                                                                                                    |    |           |        |
|--------------------------------|--------------------------------------------------------------------------------------------------------------------|----|-----------|--------|
| Stress                         | Perceived Stress Scale (80)                                                                                        | 10 | Baseline  | CAPI   |
| Aggression                     | The Brief Aggression Questionnaire (81)                                                                            | 12 | Baseline  | CAPI   |
| ADHD symptoms                  | Adult ADHD symptoms -Adapted (82)                                                                                  | 6  | Baseline  | CAPI   |
| Self-control                   | Brief Self-Control Scale (83)                                                                                      | 8  | Baseline  | CAPI   |
| Substance use                  | Alcohol, Smoking and Substance Involvement Screening Test (ASSIST) – Adapted version WHO ASSIST Working Group (84) | 9  | Baseline  | A-CASI |
| Pregnancy related beliefs      | Prenatal Attachment Inventory – Revised (85)                                                                       | 18 | Baseline  | CAPI   |
| New-born health and well-being | Norwegian Mother and Child Cohort Study (MoBa) (86)<br>Questionnaire for breastfeeding mothers (87)                | 8  | Follow-up | CAPI   |
| The mother's birth memories    | The Birth Memories and Recall Questionnaire (88)                                                                   | 5  | Follow-up | CAPI   |

Table 3. EBLs-FR measures for father's questionnaire

| Measures                                        | Sources                                                                     | N° Items | Phase                 | Data collection strategy |
|-------------------------------------------------|-----------------------------------------------------------------------------|----------|-----------------------|--------------------------|
| Feelings about fatherhood (prenatal)            | Adapted from the Avon Longitudinal Study of Parents and Children (89).      | 13       | Baseline              | Paper and pencil         |
| Fathers' participation for antenatal care       | (90,91)                                                                     | 7        | Baseline<br>Follow-up | Paper and pencil         |
| Fathers' participation for household activities | Adapted from the Avon Longitudinal Study of Parents and Children (89).      | 8        | Baseline<br>Follow-up | Paper and pencil         |
| Attitudes to fatherhood                         | Avon Longitudinal Study of Parents and Children and (89)                    | 8        | Follow-up             | Paper and pencil         |
| Paternal enjoyment                              | Avon Longitudinal Study of Parents and Children and Scourfield et al., (89) | 5        | Follow-up             | Paper and pencil         |
| Paternal confidence                             | Avon Longitudinal Study of Parents and Children and Scourfield et al., (89) | 4        | Follow-up             | Paper and pencil         |
| Activities with the new-born child              | Avon Longitudinal Study of Parents and Children and Scourfield et al., (89) | 6        | Follow-up             | Paper and pencil         |



# BMJ Open

## Evidence for Better Lives Study: A comparative birth-cohort study on child exposure to violence and other adversities in eight low- and middle-income countries – Foundational Research (Study Protocol).

|                                 |                                                                                                                                                                                                                                                                                                                                                                                                                                                                                                                                                                                                                                                                                                                                                                                                                                                                                                                                                                                                                                                                                                                                                                                                      |
|---------------------------------|------------------------------------------------------------------------------------------------------------------------------------------------------------------------------------------------------------------------------------------------------------------------------------------------------------------------------------------------------------------------------------------------------------------------------------------------------------------------------------------------------------------------------------------------------------------------------------------------------------------------------------------------------------------------------------------------------------------------------------------------------------------------------------------------------------------------------------------------------------------------------------------------------------------------------------------------------------------------------------------------------------------------------------------------------------------------------------------------------------------------------------------------------------------------------------------------------|
| Journal:                        | <i>BMJ Open</i>                                                                                                                                                                                                                                                                                                                                                                                                                                                                                                                                                                                                                                                                                                                                                                                                                                                                                                                                                                                                                                                                                                                                                                                      |
| Manuscript ID                   | bmjopen-2019-034986.R1                                                                                                                                                                                                                                                                                                                                                                                                                                                                                                                                                                                                                                                                                                                                                                                                                                                                                                                                                                                                                                                                                                                                                                               |
| Article Type:                   | Protocol                                                                                                                                                                                                                                                                                                                                                                                                                                                                                                                                                                                                                                                                                                                                                                                                                                                                                                                                                                                                                                                                                                                                                                                             |
| Date Submitted by the Author:   | 14-Apr-2020                                                                                                                                                                                                                                                                                                                                                                                                                                                                                                                                                                                                                                                                                                                                                                                                                                                                                                                                                                                                                                                                                                                                                                                          |
| Complete List of Authors:       | Valdebenito, Sara; University of Cambridge, Institute of Criminology<br>Murray, Aja; The University of Edinburgh, Department of Psychology<br>Hughes, Claire ; University of Cambridge, Centre for Family Research<br>Băban, Adriana; Babes-Bolyai University, Romania<br>Fernando, Asvini; University of Kelaniya Faculty of Medicine<br>Madrid, Bernadette J. ; University of the Philippines Manila,<br>Ward, Catherine; University of Cape Town, Department of Psychology<br>Osafo, Joseph; University of Ghana<br>Michael, Dunne; Queensland University of Technology School of Public Health and Social Work<br>Sikander, Siham; Health Services Academy<br>Walker, Susan; University of the West Indies<br>Thang, Vo Van; Hue University of Medicine and Pharmacy<br>Tomlinson, Mark; Stellenbosch University, Psychology; Queen's University Belfast, School of Nursing and Midwifery<br>Fearon, Pasco; University College London<br>Shenderovich, Yulia; University of Oxford<br>Marlow, Marguerite; Stellenbosch University<br>Chathurika , Deshanie ; University of Kelaniya<br>Taut, Diana; Babes-Bolyai University<br>Eisner, Manuel; University of Cambridge, Institute of Criminology |
| <b>Primary Subject Heading</b>: | Public health                                                                                                                                                                                                                                                                                                                                                                                                                                                                                                                                                                                                                                                                                                                                                                                                                                                                                                                                                                                                                                                                                                                                                                                        |
| Secondary Subject Heading:      | Paediatrics                                                                                                                                                                                                                                                                                                                                                                                                                                                                                                                                                                                                                                                                                                                                                                                                                                                                                                                                                                                                                                                                                                                                                                                          |
| Keywords:                       | EPIDEMIOLOGY, MENTAL HEALTH, Prenatal diagnosis < OBSTETRICS, Child protection < PAEDIATRICS, Community child health < PAEDIATRICS                                                                                                                                                                                                                                                                                                                                                                                                                                                                                                                                                                                                                                                                                                                                                                                                                                                                                                                                                                                                                                                                   |
|                                 |                                                                                                                                                                                                                                                                                                                                                                                                                                                                                                                                                                                                                                                                                                                                                                                                                                                                                                                                                                                                                                                                                                                                                                                                      |

SCHOLARONE™  
Manuscripts

1  
2  
3  
4  
5  
6  
7  
8  
9  
10  
11  
12  
13  
14  
15  
16  
17  
18  
19  
20  
21  
22  
23  
24  
25  
26  
27  
28  
29  
30  
31  
32  
33  
34  
35  
36  
37  
38  
39  
40  
41  
42  
43  
44  
45  
46  
47  
48  
49  
50  
51  
52  
53  
54  
55  
56  
57  
58  
59  
60



I, the Submitting Author has the right to grant and does grant on behalf of all authors of the Work (as defined in the below author licence), an exclusive licence and/or a non-exclusive licence for contributions from authors who are: i) UK Crown employees; ii) where BMJ has agreed a CC-BY licence shall apply, and/or iii) in accordance with the terms applicable for US Federal Government officers or employees acting as part of their official duties; on a worldwide, perpetual, irrevocable, royalty-free basis to BMJ Publishing Group Ltd ("BMJ") its licensees and where the relevant Journal is co-owned by BMJ to the co-owners of the Journal, to publish the Work in this journal and any other BMJ products and to exploit all rights, as set out in our [licence](#).

The Submitting Author accepts and understands that any supply made under these terms is made by BMJ to the Submitting Author unless you are acting as an employee on behalf of your employer or a postgraduate student of an affiliated institution which is paying any applicable article publishing charge ("APC") for Open Access articles. Where the Submitting Author wishes to make the Work available on an Open Access basis (and intends to pay the relevant APC), the terms of reuse of such Open Access shall be governed by a Creative Commons licence – details of these licences and which [Creative Commons](#) licence will apply to this Work are set out in our licence referred to above.

Other than as permitted in any relevant BMJ Author's Self Archiving Policies, I confirm this Work has not been accepted for publication elsewhere, is not being considered for publication elsewhere and does not duplicate material already published. I confirm all authors consent to publication of this Work and authorise the granting of this licence.

1  
2  
3 **Evidence for Better Lives Study: A comparative birth-cohort study on child exposure to**  
4 **violence and other adversities in eight low- and middle-income countries – Foundational**  
5 **Research (Study Protocol).**  
6  
7  
8  
9

10 Sara Valdebenito<sup>1</sup>, Aja Louise Murray<sup>2</sup>, Claire Hughes<sup>3</sup>, Adriana Baban<sup>4</sup>, Asvini D. Fernando<sup>5</sup>,  
11 Bernadette Madrid<sup>6</sup>, Catherine L. Ward<sup>7</sup>, Joseph Osafo<sup>8</sup>, Michael P. Dunne<sup>9</sup>, Siham Sikander<sup>10</sup>,  
12 Susan Walker<sup>11</sup>, Vo Van Thang<sup>12</sup>, Mark Tomlinson<sup>13-14</sup>, Pasco Fearon<sup>15</sup>, Yulia Shenderovich<sup>16</sup>,  
13 Marguerite Marlow<sup>13</sup>, Deshanie Chathurika<sup>5</sup>, Diana Taut<sup>4</sup> and Manuel Eisner<sup>1</sup>  
14  
15  
16  
17  
18

- 19 1. Institute of Criminology, University of Cambridge, Cambridge, United Kingdom
- 20 2. Department of Psychology, University of Edinburgh, Edinburgh, United Kingdom
- 21 3. Department of Psychology, University of Cambridge, Cambridge, United Kingdom
- 22 4. Department of Psychology, Babes-Bolyai University, Cluj-Napoca, Romania
- 23 5. Department of Paediatrics, Faculty of Medicine, University of Kelaniya, Sri Lanka
- 24 6. Child Protection Unit, University of the Philippines, Manila, Philippines
- 25 7. Department of Psychology and Safety and Violence Initiative, University of Cape  
26 Town, Cape Town, South Africa
- 27 8. Department of Psychology, University of Ghana, Legon, Accra, Ghana
- 28 9. School of Public Health and Social Work, Queensland University of Technology,  
29 Brisbane, Australia
- 30 10. Health Services Academy, Islamabad, Pakistan
- 31 11. Caribbean Institute for Health Research, The University of the West Indies, Kingston,  
32 Jamaica
- 33 12. Institute of Community Health Research, Faculty of Public Health, College of  
34 Medicine and Pharmacy, Hue University, Hue, Vietnam
- 35 13. Department of Psychology, Stellenbosch University, Stellenbosch, South African  
36 Institute for Life Course Health Research, Department of Global Health, Stellenbosch  
37 University, Cape Town, South Africa
- 38 14. School of Nursing and Midwifery, Queens University, Belfast, United Kingdom
- 39 15. Research Department of Clinical, Educational and Health Psychology, University  
40 College London, London, United Kingdom
- 41 16. Centre for Evidence-Based Intervention, Department of Social Policy & Intervention,  
42 University of Oxford, Oxford, United Kingdom
- 43  
44  
45  
46  
47  
48  
49  
50  
51

52 **Corresponding author:**

53 Sara Valdebenito, Institute of Criminology, University of Cambridge, Sidgwick Avenue,  
54 Cambridge CB3 9DA, United Kingdom.  
55

56 Email: [sv331@cam.ac.uk](mailto:sv331@cam.ac.uk); [sara.valdebenito@gmail.com](mailto:sara.valdebenito@gmail.com)  
57  
58  
59  
60

## ABSTRACT

**Introduction.** Violence against children is a health, human rights and social problem affecting approximately half of the world's children. Its effects begin at prenatal stages with long-lasting impacts on later health and well-being. The *Evidence for Better Lives Study* (EBLS) aims to produce high-quality longitudinal data from cities in eight low- and middle-income countries (LMICs) – Ghana, Jamaica, Pakistan, the Philippines, Romania, South Africa, Sri Lanka, and Vietnam – to support effective intervention to reduce violence against children. EBLS-Foundational Research tests critical aspects of the planned EBLS, including participant recruitment and retention, data collection and analysis. Alongside epidemiological estimates of levels and predictors of exposure to violence and adversity during pregnancy, we plan to explore mechanisms that may link exposure to violence to mothers' biological stress markers and subjective well-being.

**Methods and analyses.** EBLS-FR is a short longitudinal study with a sample of 1,200 pregnant women. Data are collected during the last trimester of pregnancy and 2-6 months after birth. The questionnaire for participating women has been translated into nine languages. Measures obtained from mothers will include, among others, mental and physical health, attitudes to corporal punishment, adverse childhood experiences, prenatal intimate partner violence (p-IPV), substance use, and social/community support. Hair and dry blood spot (DBS) samples are collected from the pregnant women to measure stress markers. To explore research participation among fathers, EBLS-FR is recruiting 300 fathers in the Philippines and Sri Lanka.

**Ethics and dissemination.** The study received ethical approvals at all recruiting sites and universities in the project. Results will be disseminated through journal publications,

1  
2  
3 conferences and seminar presentations involving local communities, health services and other  
4 stakeholders. Findings from this work will help to adjust the subsequent stages of the EBLS  
5 project.  
6  
7  
8  
9

10  
11  
12 **Key words:** Perinatal intimate partner violence, low- and middle-income countries, child  
13 development, violence exposure, cross-cultural violence research, children's rights, violence  
14 against women and children, violence prevention, perinatal and childhood adversity.  
15  
16  
17  
18  
19

## 20 21 22 **STRENGTHS AND LIMITATIONS**

- 23  
24  
25 - The study is designed to inform a large-scale, birth cohort study in eight cities across  
26 the world.  
27
- 28  
29 - Evaluating training materials and tools developed will allow refinements and  
30 improvements for the large scale study.  
31
- 32  
33 - The study will enhance engagement with policymakers, community members, and  
34 other stakeholders to support efforts to address violence against children in all study  
35 sites  
36
- 37  
38 - Data collection uses similar procedures to collect comparable data on exposure to  
39 violence.  
40
- 41  
42 - Participants are selected using a non-probabilistic sampling strategy. The  
43 generalisation to the broader underlying population is limited.  
44  
45  
46  
47  
48  
49  
50  
51  
52  
53  
54

55 Around half of children worldwide experience some form of interpersonal violence (1).  
56 Exposure to violence interferes with children's neurological and socio-emotional development,  
57 contributes to lasting behavioural problems and has lifelong effects on well-being, health and  
58  
59  
60

1  
2  
3 productivity (1–4). While the negative impact of violence has been extensively documented,  
4  
5 less is known about the effect of prenatal intimate partner violence (p-IPV) on early child  
6  
7 development. Recent research suggests that exposure to IPV during the prenatal period is  
8  
9 linked to a number of morbidities such as low birth weight, preterm delivery (5) and other  
10  
11 indices of poor foetal health (6–9). While the mechanisms explaining these outcomes remain  
12  
13 unclear, multiple possible pathways linking p-IPV with child development outcomes have been  
14  
15 suggested. These include mental illness, substance use, healthcare under-utilisation, poor  
16  
17 emotional attachment to the foetus, maternal stress, systemic inflammation and the regulation  
18  
19 of specific genes relevant to, for example, the functioning of the hypothalamic-pituitary-  
20  
21 adrenal axis (10,11). Research in humans and other mammals suggests that exposure to  
22  
23 dangerous levels of cortisol can have long-lasting impact on multiple areas of the brain,  
24  
25 affecting, for instance, the child memory, verbal IQ and behaviour (9,12).  
26  
27  
28  
29  
30  
31  
32

33 Evidence-based preventive policies are known to contribute to the reduction of violence against  
34  
35 children (13). However, to date, most research into violence during the first years of children's  
36  
37 lives has been conducted using cross-sectional, retrospective designs in affluent societies  
38  
39 (14,15). Little is known from low- and middle-income countries (LMICs), where most of the  
40  
41 world's children live and where resources to address these problems are limited (1,16).  
42  
43  
44  
45  
46

47 In this context, the *Evidence for Better Lives Study* (EBLS) aims to produce high-quality  
48  
49 evidence from non-western societies to support effective strategies to reduce violence against  
50  
51 children from pregnancy onwards. It involves an interdisciplinary policy impact and capacity-  
52  
53 building programme of longitudinal research based in eight cities chosen to reflect the diversity  
54  
55 of cultural, social and economic conditions across the globe. EBLS is an ambitious research  
56  
57 programme developed in four main stages (see Figure 1), including an initial scoping exercise  
58  
59  
60

1  
2  
3 (December 2015), a feasibility study (October 2016-March 2018), the current foundational  
4 research (July 2018-December 2019) and a full study expected to start in 2020. While the first  
5 two stages helped to articulate the aims of the project and to select the study sites, EBLS-FR  
6 tests the main components for the full study (e.g., recruitment, data collection instruments,  
7 translatis).

14  
15 *FIGURE 1 ABOUT HERE*

16  
17  
18 Four features make EBLS-Foundational Research (FR) a significant advance on previous  
19 studies. First, it recruits pregnant women in the third trimester of pregnancy, measuring  
20 prenatal exposures to violence and other adversities when they are happening and thereby  
21 overcoming the limitations of using retrospective recall (17,18).

22  
23  
24  
25  
26  
27  
28  
29  
30  
31  
32  
33  
34  
35  
36  
37  
38  
39  
40  
41  
42  
43  
44  
45  
46  
47  
48  
49  
50  
51  
52  
53  
54  
55  
56  
57  
58  
59  
60  
Second, the longitudinal design of the study allows researchers to collect information on the  
same families over time, a method that is uniquely well placed to illuminate issues that affect  
children's development, both in terms of individual and family-level factors, and also higher-  
level influences, such as changing policies and social norms related to violence and abuse  
(19,20). Longitudinal data collection yields important information on factors which may form  
part of the causal chain leading to favourable/unfavourable outcomes. Such studies provide  
essential evidence for prevention knowledge and policy-making (21–23). For example,  
longitudinal studies in Jamaica have found that limited stimulation of children in the home and  
high levels of parental stress to be negatively related to child outcomes, including cognitive  
function and behaviour (23). These findings guided the development of Jamaica's National  
Parenting Policy, public messaging, and programmes for parents.

Third, EBLS-FR addresses the lack of longitudinal studies examining violence in LMICs with  
analogous sampling and measurement to allow comparisons across locations (24). Without the  
comparable methods used for longitudinal data collection in multiple settings, it is difficult to



1  
2  
3 make cross-cultural comparisons of associations between exposures and outcomes (25).  
4  
5 Furthermore, although it is widely accepted that a foetus is influenced by the environment from  
6  
7 conception and that the period from conception to age 2-3 is critical for development (26), few  
8  
9 cohort studies in LMIC have started in pregnancy (27).  
10  
11  
12  
13

14 Fourth, a distinctive component of EBLS-FR is to engage fathers and male partners of the  
15  
16 participants and learn more about how they can be motivated to participate in research. Extant  
17  
18 research has linked father involvement in parenting to a number of crucial child outcomes, such  
19  
20 as better infant cognitive development, more positive relationships with peers, better  
21  
22 psychosocial adjustment as well as greater academic achievement (28). Conversely, psychiatric  
23  
24 disorders and violent behaviour of fathers, both inside and outside the family, can increase the  
25  
26 risk of psychological and developmental difficulties in children (29–31). While birth cohort  
27  
28 studies report lower participation rates in fathers than mothers, they have also traditionally  
29  
30 invested less in the recruitment and retention of fathers (27,32,33). Hence, EBLS-FR recruits  
31  
32 fathers in two sites, to gain further insight into engaging them in developmental research as  
33  
34 well as to run an initial examination of the fathers' characteristics and their associations with  
35  
36 maternal and child well-being.  
37  
38  
39  
40  
41  
42  
43  
44

45 In sum, a multi-country birth cohort study in LMICs, such as the planned EBLS, has major  
46  
47 potential to influence local and international policies to prevent exposure to violence. It may  
48  
49 also provide invaluable opportunities for knowledge transfer by promoting inter-country and  
50  
51 global learning about how families and communities in different societies support their children  
52  
53 to achieve their full developmental potential. EBLS-FR serves as a critical step towards  
54  
55 generating such evidence for violence prevention and the promotion of health early child  
56  
57  
58  
59  
60

1  
2  
3 development by testing rigorous and comparable ways to collect multi-country longitudinal  
4 data starting from pregnancy.  
5  
6  
7  
8  
9

## 10 **Study aims**

11  
12 This protocol outlines the motivation and methods for the EBLS-FR, developed as a pilot to  
13 inform EBLS, and examines the key uncertainties in the project design (34,35). The aims of  
14 the EBLS-FR are:  
15  
16  
17

- 18  
19 1. To develop and test strategies for recruiting pregnant women and following them up  
20 during the perinatal period across eight EBLS-FR sites.  
21  
22
- 23  
24 2. To assess the feasibility of fathers' and male partners' participation in the study.  
25  
26
- 27  
28 3. To test the strategies to collect, manage and analyse comparable high-quality data  
29 across the eight EBLS sites, including questionnaires and biological samples.  
30  
31
- 32  
33 4. To produce initial sample prevalence estimates of key indicators, such as prenatal  
34 exposure to violence, women's levels of well-being, stress, depressive symptoms, pre-  
35 and peri-natal complications, and to describe the characteristics of their male partners.  
36  
37
- 38  
39 5. To explore associations of the key indicators reported by mothers and fathers with  
40 maternal and birth outcomes.  
41  
42
- 43  
44 6. To build and strengthen local capacity for longitudinal research by coordinating skill  
45 development opportunities and establishing local and international collaborative  
46 networks that include early career researchers.  
47  
48
- 49  
50 7. To enhance engagement with policy makers, community members, and other  
51 stakeholders and ensure that future stages of EBLS produce relevant knowledge and  
52 strategies to support efforts to address violence against children in all study sites.  
53  
54  
55  
56

## 57 **DESIGN**

1  
2  
3 EBLs-FR is a prospective birth cohort study that targets 1,200 pregnant women (150 in each  
4 of eight sites) and 300 fathers (150 in each of two sites) in different cultural contexts across the  
5 world. Measurements are carried out during the third trimester of pregnancy and when the child  
6 is aged two to six months.  
7  
8  
9  
10  
11  
12  
13

### 14 **Study settings**

15  
16  
17  
18 Participating sites were selected according to the following criteria: i) country status of a Low-  
19 Middle and Upper Middle income economy (36), ii) representation of different regions of the  
20 world, iii) a political environment receptive to research-based evidence, iv) the presence of  
21 local research teams with the expertise and willingness to conduct comparative research and  
22 engage in advocacy based on the findings, and v) existing links of the research teams with local  
23 prenatal healthcare services to facilitate access to the target sample. In 2017, the participating  
24 sites and associated research teams were decided as follows (see Figure 2): Valenzuela  
25 (University of the Philippines, Philippines), Hue (Hue University, College of Medicine and  
26 Pharmacy, Vietnam), Ragama (University of Kelaniya, Sri Lanka), Tarlai Kalan (Health  
27 Services Academy, Pakistan), Cluj-Napoca (Babes-Bolyai University, Romania), Worcester  
28 (Universities of Cape Town and Stellenbosch, South Africa), Koforidua (University of Ghana,  
29 Ghana), and Kingston (University of the West Indies, Jamaica).  
30  
31  
32  
33  
34  
35  
36  
37  
38  
39  
40  
41  
42  
43  
44  
45  
46  
47  
48  
49

50 *FIGURE 2 ABOUT HERE*

51 The sites were chosen to reflect the heterogeneity of social and cultural conditions across major  
52 world regions: the Caribbean, Europe, Sub-Saharan Africa, the Indian Subcontinent and South-  
53 East Asia. An overview of several international indices provides an account of such diversity  
54 (See Table 1). For instance, a comparison of the homicide rates in each site (i.e., rate of  
55 intentional homicide per year per 100,000 inhabitants), suggests that while Romania, Sri Lanka  
56  
57  
58  
59  
60

1  
2  
3 and Vietnam report rates under the global average (6.4 per 100,000 population), Jamaica  
4 displays a rate of violence almost seven times higher than the global average (37). The Gender  
5 Inequality Index (GII) shows that Vietnam and Pakistan report the lowest and the highest rates  
6 of inequalities respectively in reproductive health, education, political representation and  
7 access to the labour market (38). Variation is also observed in other cross-comparative indexes  
8 such as GDP, Crude Birth Rates and percentage of population aged 0-14 years.  
9  
10  
11  
12  
13  
14  
15  
16  
17  
18

19 *TABLE 1 ABOUT HERE*  
20  
21

22 Capturing this diversity across the sites is critical for establishing how similar (and therefore  
23 generalisable and universal) the conditions are that lead to violence against women and  
24 children in different countries, and for demonstrating the consistency of their impact on  
25 children's long-term development. It is also crucial for understanding the cultural, contextual  
26 and policy factors that may lead to differences in risk of violence, and its adverse effects on  
27 child development. The diverse samples also offer opportunities to identify site-specific  
28 features that may be protective (39).  
29  
30  
31  
32  
33  
34  
35  
36  
37  
38  
39  
40

### 41 **Sampling strategy**

42  
43 Based on the time and resources allocated for this project, the decision was taken to use  
44 convenience sampling of participants within sites – a non-probabilistic strategy that allows a  
45 consecutive selection of participants in order of appearance (40). Since we aim to achieve a  
46 sample that involves diverse social backgrounds within the study area, each local team attempts  
47 to target a specific number of private and public prenatal medical services, when these exist.  
48  
49  
50  
51  
52  
53  
54  
55  
56

### 57 **Study participants**

58  
59  
60

1  
2  
3 *Pregnant women.* The EBLS-FR sample comprises of 150 pregnant women recruited from  
4 health centres in each of the eight sites (N=1,200 total). All women attending check-ups in the  
5 selected clinics/hospitals are eligible if they satisfy the following three criteria: i) in the third  
6 trimester of their pregnancy (i.e., weeks 29-40), ii) aged over 18 when signing the informed  
7 consent form, and iii) having their main residence within the study's defined geographical area.  
8  
9

10  
11  
12  
13  
14  
15  
16  
17 *Fathers.* Due to resource constraints, only two sites have the capacity to test the father's  
18 questionnaire. Sri Lanka and the Philippines plan to recruit a sample of 150 fathers each  
19 (N=300 total). All women who consent to participate in EBLS-FR in Sri Lanka and the  
20 Philippines are asked about the possibility of their husband or partner participating in the study.  
21 To be eligible, fathers need to meet the following three criteria: i) being the father figure to the  
22 baby, although not necessarily the biological father; ii) aged over 18 when signing the informed  
23 consent, and iii) having their main residence within the study's defined geographical area.  
24  
25  
26  
27  
28  
29  
30  
31  
32  
33

### 34 **Recruitment, screening, consent and incentives**

35  
36  
37 *Recruitment.* Trained female fieldworkers approach pregnant women directly at local health  
38 services during antenatal check-ups. When the direct approach is not feasible, potential  
39 participants are first approached by the treating clinician (e.g., nurse, midwife, obstetrician),  
40 who briefly presents the research project and asks the woman if she is willing to meet with  
41 EBLS-FR representatives. Fathers are invited to take part in the study only if the pregnant  
42 woman provides written consent to their inclusion. Note that as p-IPV is a risk factor for under-  
43 utilisation of and delayed entry into antenatal care, our recruitment through antenatal clinics is  
44 a limitation, in that it risks under-representing women experiencing abuse (41).  
45  
46  
47  
48  
49  
50  
51  
52  
53  
54  
55

56  
57 *Screening and consent.* Pregnant women and fathers expressing interest in the EBLS-FR are  
58 invited to answer a brief screening questionnaire to establish their eligibility. If eligible, they  
59  
60

1  
2  
3 are invited to provide written informed consent. Information sheets, consent forms and  
4  
5 questionnaires have been translated into the languages spoken by the participants. If the  
6  
7 participant cannot read, versions of the information sheet and consent forms are played by  
8  
9 audio recording or read out aloud. As suggested by the World Health Organization's (WHO)  
10  
11 Research Ethics Committee<sup>1</sup>, the consent of participants who cannot write is obtained via  
12  
13 alternative means (e.g., audio recording or participant's thumbprint). The number of eligible  
14  
15 participants who are approached but do not show interest in the study is also recorded, along  
16  
17 with any reasons for non-participation, if provided.  
18  
19  
20  
21  
22

23  
24 When both the woman and her husband/partner participate, they are interviewed separately to  
25  
26 ensure confidentiality (42).  
27  
28  
29

30  
31 *Incentives.* All study participants are offered a token of appreciation. Each local team  
32  
33 determines the specific incentive in consideration of cultural and local expectations, as well as  
34  
35 the corresponding ethical rules (Table 2). In all cases, the incentive is approximately equivalent  
36  
37 to the hours spent in the study, reimbursed at minimum wage in the site. In addition,  
38  
39 participants are offered a reimbursement of travel expenses to facilitate the access of  
40  
41 participants who could be underrepresented due to difficulties in paying for transport (43,44).  
42  
43

44  
45 *TABLE 2 ABOUT HERE*  
46  
47

### 48 **Patient and public involvement**

49  
50 No patients will be involved. Study participants will be informed about study outcomes via  
51  
52 websites of project partners and media reports. We are planning to produce a brief  
53  
54  
55  
56  
57

---

58  
59 <sup>1</sup> [http://www.who.int/rpc/research\\_ethics/Process\\_seeking\\_IF\\_printing.pdf](http://www.who.int/rpc/research_ethics/Process_seeking_IF_printing.pdf)  
60

1  
2  
3 information sheet at the end of the foundational research for participants and a general  
4  
5 audience.  
6  
7  
8  
9

## 10 **Data collection**

11  
12 Data collection will be implemented from February to December 2019. To ensure  
13 comparability of measures across the sites (45), the EBLS-FR team has developed a set of  
14 standardised questionnaires.  
15  
16  
17  
18

19  
20  
21 The EBLS questionnaires were first developed in English and then translated into nine different  
22 languages<sup>2</sup>. With small modifications, the process of translation has followed the guidelines  
23 suggested by the WHO<sup>3</sup>. Only minor adjustments have been made to ensure that measures are  
24 relevant in each location (e.g., which ethnicities are recorded).  
25  
26  
27  
28  
29

30  
31  
32  
33 Data are collected by fieldworkers who have received standardised 40-hours of in-person  
34 training covering topics such as recruitment, consent, data collection and storage procedures,  
35 principles of research ethics, referral procedures, and management of risk and difficult  
36 situations in the field (e.g., participant distress or unsafe situations). Special emphasis was  
37 given to skills and strategies for addressing women experiencing violence (46–48). The  
38 contents of the training were developed and approved by the EBLS consortium and they are  
39 described in the fieldworker handbook specifically developed for EBLS-FR. Training at each  
40 site was carried out by the local research coordinator who had been previously trained by the  
41 Cambridge team.  
42  
43  
44  
45  
46  
47  
48  
49  
50  
51  
52  
53  
54  
55  
56  
57  
58

---

59 <sup>2</sup> Urdu, Afrikaans, IsiXhosa, Romanian, Filipino (Tagalog), Sinhala, Tamil, Vietnamese and Twi

60 <sup>3</sup> [http://www.who.int/substance\\_abuse/research\\_tools/translation/en/](http://www.who.int/substance_abuse/research_tools/translation/en/)

### **Pregnant women: Questionnaires and instruments.**

*Questionnaire.* The questionnaire completed by pregnant women is a mix of Computer-Aided Personal Interviews (CAPI), and Computer-Assisted Self-Interviewing (CASI) for the more sensitive items (i.e., intimate partner violence, adverse childhood experiences and substance use). To facilitate access for expectant mothers with low levels of literacy, Audio-Supported Self-Completion Interviewing (A-CASI) has been programmed.

In EBLS-FR, data from participating women are collected at two time points. The baseline assessment is completed when the women are in the third trimester of their pregnancy. The baseline assessment takes approximately 120 minutes, involving the completion of a 210-item questionnaire and the collection of biological samples. Subsequently, a brief follow-up assessment is conducted with the mother when the child is at least two months old. The follow-up assessment takes approximately 20 minutes and involves the completion of a 22-item questionnaire. The follow-up assessment re-measures key variables for the EBLS-FR such as mental health and mother-child attachment. It also helps to test the process of re-contacting participants and retaining them post-birth. The nature of a pilot study has restricted the follow-up to a maximum of six months after birth. However, the main study is expected to follow participants during the first five years of life.

*Measures.* Measures for pregnant women include items on demographic factors, socioeconomic status, prenatal health and reproductive history, adverse childhood experiences, community and social support, p-IPV, mental health and other psychological traits, as well as prenatal maternal attachment to the unborn child. The follow-up measures collect data on mothers' mental health, child well-being and birth memories (see Table 3).



1  
2  
3 Informed by a literature review developed by the EBLS consortium (11), we have identified  
4  
5 salient factors that may relate to the predictors and consequences of exposure to violence in the  
6  
7 perinatal period. For reasons of space, we simply describe below the main measures used to  
8  
9 capture these factors.  
10  
11

12  
13  
14 *Prenatal Intimate Partner Violence (p-IPV).* p-IPV is measured using a scale extracted from  
15  
16 the WHO's multi-country study on women's health and domestic violence against women (46).  
17  
18 It measures exposure to violence during the last six months (i.e., current pregnancy). We use  
19  
20 six items to capture physical violence (e.g., I was hit with a fist or something else that could  
21  
22 hurt); four items to measure emotional abuse (e.g., I was insulted or made to feel bad about  
23  
24 myself); and three items for sexually abusive behaviours (e.g., I was physically forced to have  
25  
26 sexual intercourse when I did not want to). A four-point Likert scale (i.e., *never, once, a few*  
27  
28 *times, many times*) allows the participant to report the frequency of exposure to such  
29  
30 experiences in her lifetime and over the last six months. Questions have been validated in multi-  
31  
32 racial, ethnic populations and in pregnant women and therefore have appropriate psychometric  
33  
34 properties (49,50). Exposure to p-IPV is collected using A-CASI as this approach has been  
35  
36 demonstrated to facilitate the disclosure of IPV when compared with face-to-face interviews  
37  
38 and self-administered written screens (51,52).  
39  
40  
41  
42  
43  
44  
45  
46

47 *The Perceived Stress Scale (PSS).* The PSS, developed by Cohen and Williamson (53), was  
48  
49 designed to measure the degree to which respondents appraise aspects of their own life  
50  
51 experiences as unpredictable, uncontrollable and emotionally overwhelming. The scale  
52  
53 includes 10 items (e.g., feeling one could not cope with all the things that one had to do) and  
54  
55 responses are provided using a four-point Likert scale (i.e., *not at all, several days, more than*  
56  
57 *half the days, nearly every day*). The PSS has superior psychometric properties when used with  
58  
59  
60

1  
2  
3 a normative population, when compared with alternative scales and also when administered to  
4 pregnant mothers (54,55).  
5  
6  
7  
8  
9

10 *Hair samples.* Each pregnant woman is asked to provide a sample of hair cut from the posterior  
11 vertex area (where growth rates are least variable), as close as possible to the scalp. Hair  
12 samples produce measures of cortisol concentrations, an index of accumulated stress exposure  
13 validated for use in pregnant women (56). Since each centimetre of hair represents a month's  
14 period of exposure, it is possible to quantify cumulative physiological stress during the second  
15 trimester of pregnancy. Previous research has suggested the second trimester of pregnancy in  
16 particular as a critical period for stress exposure (9)  
17  
18  
19  
20  
21  
22  
23  
24  
25  
26  
27

28 *Blood samples.* Dried blood spots are collected by applying a few drops of blood, drawn by  
29 lancet from a finger, onto medical-grade, absorbent filter paper. Blood samples are analysed  
30 for C-reactive protein (C-RP), a biomarker of inflammation,. We will relate these biomarkers  
31 to information on violence exposure and maternal outcomes in order to illuminate the  
32 biological mechanisms underpinning the effects of violence and adversity exposure on  
33 maternal and birth outcomes (57–59).  
34  
35  
36  
37  
38  
39  
40  
41  
42  
43  
44

45 *TABLE 3 ABOUT HERE*  
46  
47  
48  
49  
50  
51  
52  
53  
54  
55  
56  
57  
58  
59  
60

45 *Father questionnaires.* Data are collected using a paper and pencil questionnaire at two  
46 different time points. As in the case of pregnant women, the baseline assessment is completed  
47 during the third trimester of the woman's pregnancy. Interviews take approximately 40  
48 minutes, involving the completion of a 90-item questionnaire. The follow-up assessment  
49 encompasses 37 items to be completed in about 20 minutes.  
50  
51  
52  
53  
54  
55  
56  
57  
58  
59  
60

1  
2  
3 *Measures.* The father questionnaire requests information on demographic factors,  
4 socioeconomic status, adverse childhood experiences, partner support, mental health,  
5 psychological traits and substance use. These items are similar to those used in the mother's  
6 questionnaire. However, the father questionnaire includes some specific items measuring  
7 attitudes to fatherhood, participation in antenatal care visits, and the father's participation in  
8 household activities (60–62). The follow-up assessment asks the participant to complete items  
9 on paternal attitudes, paternal enjoyment and paternal confidence after birth (See Table 4).  
10  
11  
12  
13  
14  
15  
16  
17  
18  
19  
20  
21  
22

23  
24  
25  
26  
27  
28  
29  
30  
31  
32  
33  
34  
35  
36  
37  
38  
39  
40  
41  
42  
43  
44  
45  
46  
47  
48  
49  
50  
51  
52  
53  
54  
55  
56  
57  
58  
59  
60

*TABLE 4 ABOUT HERE*

### **Data analysis**

Descriptive statistics will include frequency of p-IPV, and associations between exposure to violence and the putative outcomes (e.g., C-RP, childbirth weight, maternal mental health). At the same time, candidate mediators and moderators in exposure-outcome associations will be explored. We will conduct measurement invariance analysis and make comparisons on latent variables across the sites. Statistical techniques will thus include linear and generalised linear models, structural equation models and multi-group item response theory and/or factor models. When data from multiple sites are used, multi-level models or multi-group models will be used to take account of the nested structure of the data. If available, EBLIS-FR data will be compared with prevalence in the population. For instance, frequencies of IPV, perinatal depression and levels of stress or substance use will be compared with the prevalence of the same risk factors in the city's population. For the sites that conduct father interviews, models such as actor-partner interdependence models will be used to illuminate the influences of partners on one another's mental health, well-being, and parental behaviour (63).

1  
2  
3 All primary analyses will be pre-registered using open-access resources, such the Open Science  
4 Framework (<https://osf.io/>). After a period of embargo, data will be available for the use of the  
5  
6 international scientific community. Local stakeholders will be consulted to prioritise additional  
7  
8 research questions to be answered with the data.  
9  
10  
11  
12  
13

### 14 **Ethics and dissemination**

15  
16 The EBLS-FR protocol for recruitment and collection of data has been approved by the Ethics  
17  
18 Boards of all universities involved in the project (see section declarations for more detail).  
19  
20 Results will be disseminated through journal publications, conferences and seminar  
21  
22 presentations involving local communities, health services and other stakeholders.  
23  
24  
25  
26  
27

### 28 **Confidentiality and data protection**

29  
30 In EBLS-FR all participants are assigned a numeric identification (ID) code. The personally  
31  
32 identifiable data, including contact details, are kept separate from all data collected via  
33  
34 questionnaires to ensure confidentiality. EBLS uses a number of technical and organisational  
35  
36 measures to maintain security, confidentiality, completeness and integrity of the data  
37  
38 associated with the study. This includes adherence to the requirements on collection and  
39  
40 processing of personal identifiable data as stipulated by the General Data Protection Regulation  
41  
42 (GDPR) EU 2016/679.  
43  
44  
45  
46  
47  
48

### 49 **Data quality and data management**

50  
51 Multiple strategies are utilised to enhance the quality of data collection. These include training  
52  
53 of project workers in the administration of questionnaires, training of clinical and project staff  
54  
55 in the measurement of specific indices, and validation checks for consistency and completeness  
56  
57 of routinely collected data. Lab analyses will be subject to strict quality controls based on  
58  
59  
60

1  
2  
3 established protocols. Data will be screened for out-of-range or otherwise implausible values  
4  
5 before finalising the dataset.  
6  
7  
8  
9

### 10 **Organisational structure**

11  
12 EBLIS comprises a consortium of 15 co-investigators who are collectively responsible for  
13  
14 conducting the research. Given the multi-disciplinary nature of violence and its impacts on  
15  
16 child development, the team includes expertise in disciplines such as developmental  
17  
18 psychopathology, paediatrics, criminology, and public health. The organisational structure  
19  
20 includes a coordinating team at the University of Cambridge. In each of the sites, a  
21  
22 collaborative research team has been established to implement the EBLIS-FR study.  
23  
24  
25  
26  
27

### 28 **DISCUSSION**

29  
30 Ending violence against children, dealing with its consequences, and reducing children's  
31  
32 exposure to threats to their healthy development, requires a better understanding of the factors  
33  
34 that foster child development in various societies and the identification of risk factors that need  
35  
36 to be addressed most urgently. EBLIS is designed to make novel contributions to these key  
37  
38 questions by drawing on parallel data collection in eight sites, thus enabling both within- and  
39  
40 cross-country analyses. While the experience of conducting the EBLIS-FR will illuminate the  
41  
42 feasibility of procedures for the next stages, psychometric analyses will provide empirical  
43  
44 information on the cross-cultural performance of the study's measures. Analyses of the EBLIS-  
45  
46 FR data will also provide initial estimates of the levels of exposure to adversity and the  
47  
48 relationships between exposures and outcomes, as well as test potential pathways and  
49  
50 moderating factors.  
51  
52  
53  
54  
55  
56  
57  
58  
59  
60

1  
2  
3 Conducting research in multiple regions will allow us to examine how findings generalise  
4 across different socio-cultural and political contexts. To complement participants' reports of  
5 their experiences and behaviours, the study will also include biological data collection to  
6 examine biological pathways related to violence and health. This will allow us to test for the  
7 first time the combined role of systemic inflammation and the HPA axis on mediating links  
8 between p-IPV and maternal and birth outcomes. It has been argued that highlighting the  
9 biological effects of social issues (such as violence) can be particularly effective in motivating  
10 policy change (64). EBLS-FR data collection tools and datasets from eight countries can also  
11 benefit the broader research community working on violence prevention.  
12  
13  
14  
15  
16  
17  
18  
19  
20  
21  
22  
23  
24  
25

26 EBLS-FR has also been designed to foster strategic collaborations, knowledge exchange and  
27 capacity building between researchers, communities and policy makers in order to link research  
28 findings to policy actions. Future stages of EBLS will reveal the extent and manifestations of  
29 exposure to violence in each site; they will identify the salience of risk and protective factors  
30 for different groups and contexts; they will alert decision-makers to the short and long-term  
31 consequences of violence against women and children that are not currently addressed; and  
32 they will establish the essential basis for future actions. Such knowledge exchange between  
33 researchers and governments is essential to establish and evaluate prevention efforts and report  
34 on progress toward SDG violence reduction targets (65).  
35  
36  
37  
38  
39  
40  
41  
42  
43  
44  
45  
46  
47  
48

49 Conducting a multi-site project poses both research design and management questions of how  
50 to maintain comparability across countries while also examining relevant issues that are only  
51 present in some of the contexts, such as child marriage. As reflected in the organisational  
52 structure of the study, we believe that multi-country, multi-disciplinary projects require both a  
53 strong level of international coordination and collaboration with local governance structures.  
54  
55  
56  
57  
58  
59  
60

## REFERENCES

1. Hillis S, Mercy J, Amobi A, Kress H. Global prevalence of past-year violence against children: A systematic review and minimum estimates. *Pediatrics*. 2016;137(3):1–13.
2. Devries K, Watts C, Yoshihama M, Kiss L, Blima L, Deyessa N, et al. Violence against women is strongly associated with suicide attempts: Evidence from the WHO multi-country study on women 's health and domestic violence against women. *Soc Sci Med*. 2011;73:79–86.
3. Norman RE, Byambaa M, De R, Butchart A, Scott J, Vos T. The long-term health consequences of child physical abuse, emotional abuse , and neglect: A systematic review and meta-analysis. *PLoS Med*. 2012;9(11):1–31.
4. UNICEF. *Hidden in Plain Sight*. New York, NY; 2015.
5. Donovan BM, Spracklen CN, Schweizer ML, Ryckman KK. Intimate partner violence during pregnancy and the risk for adverse infant outcomes : a systematic review and meta-analysis. *BJOG An Int J Obstet Gynaecol*. 2016;123:1289–99.
6. Betts KM, Williams GM, Najman JM, Alati RA. The relationship between maternal depressive, anxious, and stress symptoms during pregnancy and adult offspring behavioral and emotional problems. *Depress Anxiety*. 2015;32:82–90.
7. Martinez-Torteya C, Bogat GA, Levendosky AA, Von Eye A. The influence of prenatal intimate partner violence exposure on hypothalamic – pituitary – adrenal axis reactivity and childhood internalizing and externalizing symptoms. *Dev Psychopathol*.

- 1  
2  
3 2016;28:55–72.  
4  
5  
6 8. Moffitt TE, Klaus-Grawe. Childhood exposure to violence and lifelong health: Clinical  
7  
8 intervention science and stress biology research join forces. *Dev Psychopathol.*  
9  
10 2013;25(402):1–28.  
11  
12 9. Monk C, Georgieff MK, Osterholm EA. Maternal prenatal distress and poor nutrition -  
13  
14 mutually influencing risk factors affecting infant neurocognitive development. *J Child*  
15  
16 *Psychol Psychiatry.* 2013;54(2):115–30.  
17  
18 10. Weaver ICG, Cervoni N, Champagne FA, D’Alessio AC, Sharma S, Seckl JR, et al.  
19  
20 Epigenetic programming by maternal behavior. *Nat Neurosci* [Internet]. 2004 Jun  
21  
22 27;7:847. Available from: <https://doi.org/10.1038/nn1276>  
23  
24  
25 11. Murray AL, Kaiser D, Valdebenito S, Hughes C, Baban A, Fernando AD, et al. The  
26  
27 Intergenerational Effects of Intimate Partner Violence in Pregnancy: Mediating  
28  
29 Pathways and Implications for Prevention. *Trauma, Violence, Abuse* [Internet].  
30  
31 2018;152483801881356. Available from:  
32  
33 <http://journals.sagepub.com/doi/10.1177/1524838018813563>  
34  
35  
36 12. Ohl F, Michaelis T, Vollmann-honsdorf GK. Effect of chronic psychosocial stress and  
37  
38 long-term cortisol treatment on hippocampus-mediated memory and hippocampal  
39  
40 volume: A pilot-study in tree shrews. *Psychoneuroendocrinology.* 2000;25:357–63.  
41  
42  
43 13. Eisner M, Nivette A, Louise A, Krisch M. Achieving population-level violence  
44  
45 declines: Implications of the international crime drop for prevention programming. *J*  
46  
47 *Public Health Policy.* 2016;37(S1):66–80.  
48  
49  
50 14. WHO. Violence prevention. The evidence. *Ser briefings violence Prev Switz.* 2010;1–  
51  
52 127.  
53  
54  
55 15. Averdijk M, Eisner M, Luciano E, Valdebenito S, Obsuth I. Wirksame  
56  
57 gewaltprävention. Eine übersicht zum internationalen wissensstand [Internet]. 2014.  
58  
59  
60



- 1  
2  
3 274 p. Available from: [https://www.npg-rsp.ch/fileadmin/npg-](https://www.npg-rsp.ch/fileadmin/npg-rsp/Themen/Averdijk_2014_Gewaltpraevention_UEbersicht.pdf)  
4  
5  
6 [rsp/Themen/Averdijk\\_2014\\_Gewaltpraevention\\_UEbersicht.pdf](https://www.npg-rsp.ch/fileadmin/npg-rsp/Themen/Averdijk_2014_Gewaltpraevention_UEbersicht.pdf)  
7
- 8 16. Fernald LCH, Kariger P, Engle P, Raikes A. Examining early child development in  
9  
10 low-income countries: A toolkit for the assessment of children in the first five years of  
11  
12 life. World Bank. 2009;1–210.  
13
  - 14 17. Hardt J, Rutter M. Validity of adult retrospective reports of adverse childhood  
15  
16 experiences: review of the evidence. *J of Child Psychol Psychiatry*. 2004;45(2):260–73.  
17
  - 18 18. Boeke CE, Oliveros H, Mora-Plazas M, Agudelo-Cañas S, Villamor E. Validity of  
19  
20 Maternal Birthweight Recall Among Colombian. *Matern Child Health J*. 2012;16:753–  
21  
22 9.  
23
  - 24 19. Dunn K, Banati P. Strength in numbers. How longitudinal research can support child  
25  
26 development. Florence; 2015.  
27
  - 28 20. Young Lives. What can comparative country research tell us about child poverty?  
29  
30 2017;(May):2–3. Available from:  
31  
32 [http://younglives.org.uk/sites/www.younglives.org.uk/files/YL-MethodsGuide-](http://younglives.org.uk/sites/www.younglives.org.uk/files/YL-MethodsGuide-WhyFourCountries.pdf)  
33  
34 [WhyFourCountries.pdf](http://younglives.org.uk/sites/www.younglives.org.uk/files/YL-MethodsGuide-WhyFourCountries.pdf)  
35  
36
  - 37 21. Golding J, Jones R, Bruné M, Pronczuk J. Why carry out a longitudinal birth survey?  
38  
39 *Paediatr Perinat Epidemiol*. 2008;23(Suppl. 1):1–14.  
40  
41
  - 42 22. McCaw-Binns A, Ashley D, Samms-Vaughan M. Impact of the Jamaican birth cohort  
43  
44 study on maternal, child and adolescent health policy and practice. *Paediatr Perinat*.  
45  
46 2010;24(3):3–11.  
47  
48
  - 49 23. Samms-Vaughan M. Comprehensive longitudinal studies of child health, development  
50  
51 and behaviour in Jamaica: Findings and policy impact. *West Indian Med J*.  
52  
53 2008;57(6):639–44.  
54  
55
  - 56 24. Murray J, Shenderovich Y, Gardner F, Mikton C, Derzon JH, Liu J, et al. Risk factors  
57  
58  
59  
60

- 1  
2  
3 for antisocial behavior in low- and middle-income countries: A systematic review of  
4 longitudinal studies. *Crime and Justice*. 2018;  
5  
6  
7  
8 25. Abramsky T, Watts CH, Garcia-Moreno C, Devries K, Kiss L, Ellsberg M, et al. What  
9 factors are associated with recent intimate partner violence? findings from the WHO  
10 Multi-country Study on women's Health and Domestic Violence. *BMC Public Health*.  
11 2011;11.  
12  
13  
14  
15  
16  
17 26. Daelmans B, Darmstadt GL, Lombardi J, Black MM, Britto PR, Lye S, et al. Early  
18 childhood development: the foundation of sustainable development. *Lancet*.  
19 2017;389(10064):9–11.  
20  
21  
22  
23  
24 27. Kiernan K. Fathers and partners in national and international birth cohort studies. *Life*  
25 *Study Expert Advis Gr Father Partners*. 2014;(January):1–23.  
26  
27  
28  
29 28. Wong JJ, Roubinov DS, Gonzales NA, Millsap RE. Father enrollment and  
30 participation in a parenting intervention: Personal and contextual predictors. *Fam*  
31 *Process*. 2013;52(3):440–54.  
32  
33  
34  
35  
36 29. Ramchandani PG, Connor TGO, Evans J, Heron J, Murray L, Stein A. The effects of  
37 pre-and postnatal depression in fathers: A natural experiment comparing the effects of  
38 exposure to depression on offspring. *J Child Psychol Psychiatry*. 2008;49(10):1069–  
39 78.  
40  
41  
42  
43  
44  
45 30. Hughes C, Devine RT, Mesman J, Blair C, Team N. Parental well-being, couple  
46 relationship quality, and children's behavioral problems in the first 2 years of life. *Dev*  
47 *Psychopathology*. 2019;1–10.  
48  
49  
50  
51  
52 31. Ramchandani P, Psychogiou L. Paternal psychiatric disorders and children's  
53 psychosocial development. *Lancet*. 2009;374:646–53.  
54  
55  
56  
57 32. Cabrera NJ, Volling BL, Barr R. Fathers Are Parents, Too! Widening the Lens on  
58 Parenting for Children's Development. *Child Dev Perspect*. 2018;12(3):152–7.  
59  
60

- 1  
2  
3 33. Phares V, Fields S, Kamboukos D, Lopez E. Still Looking for Poppa. *Am Psychol*.  
4  
5 2005;127(October):735–6.  
6
- 7  
8 34. Craig P, Dieppe P, Macintyre S, Michie S, Nazareth I, Petticrew M. Developing and  
9  
10 evaluating complex interventions: The new Medical Research Council guidance. *BMJ*  
11  
12 [Internet]. 2008;337:1–6. Available from: <http://dx.doi.org/doi:10.1136/bmj.a1655>  
13
- 14  
15 35. Shader R. Note Proof of Feasibility: What a Pilot Study Is and Is Not. *Clin Ther*.  
16  
17 2015;37(7):1379–80.  
18
- 19  
20 36. OECD. DAC List of ODA Recipients Effective for reporting on 2018, 2019 and 2020  
21  
22 flows [Internet]. 2020 [cited 2020 Mar 5]. Available from:  
23  
24 [https://www.oecd.org/dac/financing-sustainable-development/development-finance-](https://www.oecd.org/dac/financing-sustainable-development/development-finance-standards/DAC_List_ODA_Recipients2018to2020_flows_En.pdf)  
25  
26 [standards/DAC\\_List\\_ODA\\_Recipients2018to2020\\_flows\\_En.pdf](https://www.oecd.org/dac/financing-sustainable-development/development-finance-standards/DAC_List_ODA_Recipients2018to2020_flows_En.pdf)  
27
- 28  
29 37. WHO. World health statistics 2018: Monitoring health for the SDGs, sustainable  
30  
31 development goals. Geneva; 2018.  
32
- 33  
34 38. UN. Human development indices and indicators: 2018 statistical update. United  
35  
36 Nations Dev Program [Internet]. 2018;i–112. Available from:  
37  
38 [http://hdr.undp.org/sites/default/files/hdr2018\\_technical\\_notes.pdf](http://hdr.undp.org/sites/default/files/hdr2018_technical_notes.pdf)  
39
- 40  
41 39. Morrow V. What Can Comparative Country Research Tell Us About Child Poverty ?  
42  
43 *Young Lives Methods Guid*. 2015;(June):1–2.  
44
- 45  
46 40. Martínez-Mesa J, Pereira Duquia R, Bastos JL, González-Chica DA, Rangel  
47  
48 Bonamigo R. Sampling: how to select participants in my research study? *An Bras*  
49  
50 *Dermatol*. 2016;91(3):326–30.  
51
- 52  
53 41. Musa A, Chojenta C, Geleto A, Loxton D. The associations between intimate partner  
54  
55 violence and maternal health care service utilization: a systematic review and meta-  
56  
57 analysis. *BMC Womens Health*. 2019;19(36):1–14.  
58
- 59  
60 42. Rabel B V., Cunningham SA, Stephenson R. Interview Interruption and Responses to

- 1  
2  
3 Questions About Domestic Violence in India. *Violence Against Women*.  
4  
5 2014;20(8):937–47.  
6  
7  
8 43. Abshire M, Dinglas VD, Cajita MIA, Eakin MN, Needham DM, Himmelfarb CD.  
9  
10 Participant retention practices in longitudinal clinical research studies with high  
11  
12 retention rates. *BMC Med Reserach Methodol*. 2017;17(30):1–10.  
13  
14  
15 44. Laurie H, Lynn P. The use of respondent incentives on longitudinal surveys. *ISER*  
16  
17 *Work Pap Ser*. 2008;42:1–32.  
18  
19  
20 45. Gjersing L, Caplehorn JRM, Clausen T. Cross-cultural adaptation of research  
21  
22 instruments: language, setting, time and statistical considerations. *BMC Med Res*  
23  
24 *Methodol*. 2010;10(13):1–10.  
25  
26  
27 46. García-Moreno C, Jansen HAFM, Ellsberg M, Heise L, Watts CH. WHO Multi-  
28  
29 country Study on Women’s Health and Domestic Violence Against Women. Initial  
30  
31 results on prevalence, health outcomes and women’s responses. *World Heal*  
32  
33 *Organaisation*. 2005;  
34  
35  
36 47. CIOMS, WHO. International Ethical Guidelines for Epidemiological Studies Ethical  
37  
38 Guidelines for Epidemiological [Internet]. Geneva; 2009. Available from:  
39  
40 [https://cioms.ch/wp-](https://cioms.ch/wp-content/uploads/2017/01/International_Ethical_Guidelines_LR.pdf)  
41  
42 [content/uploads/2017/01/International\\_Ethical\\_Guidelines\\_LR.pdf](https://cioms.ch/wp-content/uploads/2017/01/International_Ethical_Guidelines_LR.pdf)  
43  
44  
45 48. WHO. Putting Women First: Ethical and safety recommendations for research on  
46  
47 domestic violence against women. *World Heal Organ*. 2001;33.  
48  
49  
50 49. Garcia-Moreno C, Jansen HAFM, Ellsberg M, Heise L, Watts CH. Prevalence of  
51  
52 intimate partner violence: Findings from the WHO multi-country study on women’s  
53  
54 health and domestic violence. *Lancet*. 2006;368:1260–9.  
55  
56  
57 50. Pallitto CC, García-moreno C, Jansen HAFM, Heise L, Ellsberg M, Watts C. Intimate  
58  
59 partner violence, abortion, and unintended pregnancy: Results from the WHO Multi-  
60

- country Study on Women's Health and Domestic Violence. *Int J Gynecol Obstet*. 2013;120:3–9.
51. Fincher D, Vanderende K, Colbert K, Houry D, Smith LS, Yount KM. Effect of Face-to-Face Interview Versus Interview on Disclosure of Intimate Partner Violence Among African American Women in WIC Clinics. *J Interpers Violence*. 2015;30(5):818–38.
52. Hussain N, Sprague S, Madden K, Hussain FN, Pindiprolu B, Bhandari M. A Comparison of the Types of Screening Tool Administration Methods Used for the Detection of Intimate Partner Violence : A Systematic Review and Meta-Analysis. *Trauma Violence Abuse*. 2015;16(1):60–9.
53. Cohen S, Williamson G. Perceived stress in a probability sample of the United States. In: Spacapan S, Oskamp S, editors. *The social psychology of health*. California: Newbury Park; 1988.
54. Robinson AM, Benzie KM, Cairns SL, Fung T, Tough SC. Who is distressed ? A comparison of psychosocial stress in pregnancy across seven ethnicities. *BMC Pregnancy Childbirth* [Internet]. 2016;16(215):1–11. Available from: <http://dx.doi.org/10.1186/s12884-016-1015-8>
55. Solivan AE, Xiong X, Harville EW, Buekens P. Measurement of Perceived Stress Among Pregnant Women : A Comparison of Two Different Instruments. *Matern Child Health J*. 2015;19:1910–5.
56. Scharlau F, Pietzner D, Vogel M, Gaudl A, Ceglarek U, Thiery J, et al. Evaluation of hair cortisol and cortisone change during pregnancy and the association with self-reported depression, somatization, and stress symptoms. *Stress*. 2017;1–8.
57. Zhang J, Luo W, Huang P, Peng L, Huang Q. Maternal C-reactive protein and cytokine levels during pregnancy and the risk of selected neuropsychiatric disorders in

- 1  
2  
3  
4  
5  
6  
7  
8  
9  
10  
11  
12  
13  
14  
15  
16  
17  
18  
19  
20  
21  
22  
23  
24  
25  
26  
27  
28  
29  
30  
31  
32  
33  
34  
35  
36  
37  
38  
39  
40  
41  
42  
43  
44  
45  
46  
47  
48  
49  
50  
51  
52  
53  
54  
55  
56  
57  
58  
59  
60
- off spring : A systematic review and meta-analysis. *J Psychiatr Res* [Internet]. 2018;105(April):86–94. Available from: <https://doi.org/10.1016/j.jpsychires.2018.09.002>
58. Brindle E, Fujita M, Shofer J, Connor KAO. Serum , plasma , and dried blood spot high-sensitivity C-reactive protein enzyme immunoassay for population research. *J Immunol Methods* [Internet]. 2010;362(1–2):112–20. Available from: <http://dx.doi.org/10.1016/j.jim.2010.09.014>
59. Meier-ewert HK, Ridker PM, Rifai N, Price N, Dinges DF, Mullington JM. Absence of Diurnal Variation of C-Reactive Protein Concentrations in Healthy Human Subjects. 2001;430:426–30.
60. Scourfield J, Culpin I, Gunnell D, Dale C, Joinson C, Heron J, et al. The association between characteristics of fathering in infancy and depressive symptoms in adolescence: A UK birth cohort study. *Child Abus Negl*. 2016;58:119–28.
61. Davis J, Vyankandondera J, Luchters S, Simon D, Holmes W. Male involvement in reproductive, maternal and child health: A qualitative study of policymaker and practitioner perspectives in the Pacific. *Reprod Health*. 2016;13(1):1–11.
62. Davis J, Vaughan C, Nankinga J, Davidson L, Kigodi H, Alalo E, et al. Expectant fathers’ participation in antenatal care services in Papua New Guinea: A qualitative inquiry. *BMC Pregnancy Childbirth*. 2018;18(1):1–13.
63. Cook WL, Kenny DA. The Actor – Partner Interdependence Model : A model of bidirectional effects in developmental studies. *Int J Behav Dev*. 2005;29(2):101–9.
64. Mcdade TW, Williams S, Snodgrass JJ. What a drop can do: dried blood spots as a minimally invasive method for integrating biomarkers into population-based research. *Demography*. 2007;44(4):899–925.
65. UN. The Sustainable Development Goals Report [Internet]. New York; 2019.

- 1  
2  
3 Available from: <https://unstats.un.org/sdgs/report/2019/The-Sustainable-Development-Goals-Report-2019.pdf>  
4  
5  
6  
7
- 8 66. World Bank. GDP per capita, PPP (current international \$) 2017-2018 [Internet]. 2018.  
9  
10 Available from:  
11  
12 <https://data.worldbank.org/indicator/NY.GDP.PCAP.PP.CD?locations=1W-AF>  
13  
14
- 15 67. World Bank. Crude birth rated. 2018.  
16
- 17 68. World Bank. Population ages 0-14 (% of total population). 2018.  
18
- 19 69. ICF. Demographic and Health Survey Interviewer's Manual. Rockville, Maryland,  
20 USA ICF. 2017;(June).  
21  
22
- 23 70. Adler NE, Epel ES, Castellazzo G, Ickovics JR. Relationship of subjective and  
24 objective social status with psychological and physiological unctioing: Preliminary  
25 data in healthy white women. *Heal Psychol*. 2000;19(6):586–92.  
26  
27
- 28 71. Anand SS, Vasudevan A, Gupta M, Morrison K, Kurpad A, Teo KK. Rationale and  
29 design of South Asian Birth Cohort (START): a Canada-India collaborative study.  
30 *BMC Public Health* [Internet]. 2013;13:79. Available from: BMC Public Health  
31  
32
- 33 72. University of London. Institute of Education. Centre for Longitudinal Studies.  
34 Millennium Cohort Study: First Survey, 2001-2003. [data collection]. 12th ed. UK  
35 Data Service. SN: 4683; 2017.  
36  
37
- 38 73. Deater-Deckard K, Lansford JE, Dodge KA, Bates JE. The Development of Attitudes  
39 About Physical Punishment: An 8- Year Longitudinal Study. *J Fam Psychol*.  
40 2003;17(3):351–60.  
41  
42
- 43 74. Sampson RJ, Raudenbush SW, Earls F. Neighborhoods and violent crime: A  
44 multilevel study of collective efficacy. *Science (80- )*. 1997;277(15):918–24.  
45  
46
- 47 75. WHO. Adverse Childhood Experiences International Questionnaire ( ACE-IQ )  
48 [Internet]. 2018. Available from:  
49  
50  
51  
52  
53  
54  
55  
56  
57  
58  
59  
60

- 1  
2  
3 [https://www.who.int/violence\\_injury\\_prevention/violence/activities/adverse\\_childhood\\_experiences/questionnaire.pdf?ua=1](https://www.who.int/violence_injury_prevention/violence/activities/adverse_childhood_experiences/questionnaire.pdf?ua=1)  
4  
5  
6  
7  
8 76. Goldberg JS, Carlson M. Parents' relationship quality and children's behavior in stable  
9 married and cohabiting families. *J Marriage Fam.* 2014;76(4):762–77.  
10  
11  
12 77. Zimet GD, Dahlem NW, Zimet SG, Farley GK. The Multidimensional Scale of  
13 Perceived Social Support. *J Pers Assess.* 1988;52(1):30–41.  
14  
15  
16 78. Winther-Topp C, Dinesen-Østergaard S, Søndergaard S, Bech P. The WHO-5 Well-  
17 Being Index : A Systematic Review of the Literature. *Psychother Psychosom*  
18 [Internet]. 2015;84:167–76. Available from:  
19 [https://www.who.int/violence\\_injury\\_prevention/violence/activities/adverse\\_childhood\\_experiences/questionnaire.pdf?ua=1](https://www.who.int/violence_injury_prevention/violence/activities/adverse_childhood_experiences/questionnaire.pdf?ua=1)  
20  
21  
22  
23  
24  
25  
26  
27  
28 79. Kroenke K, Spitzer RL, Williams JBW. The PHQ-9. *J Gen Intern Med.* 2001;16:606–  
29 13.  
30  
31  
32  
33 80. Osman A, Bagge C, Gutierrez P, Konick L, Kopper B, Barrios F. The suicidal  
34 behaviours questionnaire revised (SBQ-R): Validation with clinical and nonclinical  
35 samples. *Assessment.* 2001;8(4):443–54.  
36  
37  
38  
39 81. Cohen S. Perceived stress scale. *Mindgarden.* 1994;1–5.  
40  
41  
42 82. Webster GD, Dewall CN, Jr RSP, Deckman T, Jonason PK, Le BM, et al. The Brief  
43 Aggression Questionnaire: Psychometric and behavioral evidence for an efficient  
44 measure of trait aggression. *Aggress Behav.* 2014;40:120–39.  
45  
46  
47  
48 83. van de Glind G, van den Brink W, Koeter MW, Carpentier P, van Emmerik-van  
49 Oortmerssen K, Kaye S, et al. Validity of the Adult ADHD Self-Report Scale (ASRS)  
50 as a screener for adult ADHD in treatment seeking substance use disorder patients.  
51 *Drug Alcohol Depend.* 2013;1(132):587–96.  
52  
53  
54  
55  
56  
57  
58 84. Maloney PW, Grawitch MJ, Barber LK. The multi-factor structure of the Brief Self-  
59  
60



- 1  
2  
3 Control Scale: Discriminant validity of restraint and impulsivity. *J Res Pers*.  
4  
5 2012;46:111–5.  
6  
7  
8 85. WHO ASSIST Working Group. The Alcohol,Smoking and Substance Involvement  
9  
10 Screening Test (ASSIST): development, reliability and feasibility. *Addiction*.  
11  
12 2002;97:1183–94.  
13  
14  
15 86. Pallant JF, Haines HM, Hildingsson I, Cross M, Rubertsson C. Psychometric  
16  
17 evaluation and refinement of the Prenatal Attachment Inventory. *J Reprod Infant*  
18  
19 *Psychol*. 2014;32(2):112–25.  
20  
21  
22 87. Magnus P, Irgens LM, Haug K, Nystad W, Skjærven R. Cohort profile: The  
23  
24 Norwegian Mother and Child Cohort Study ( MoBa ). *INternational*. 2006;35:1146–  
25  
26 50.  
27  
28  
29 88. UNICEF/WHO. Questionnaire for Breastfeeding Mother. *BFHI Sect 4 Hosp Self-*  
30  
31 *Appraisal Monit*. 2009;64–6.  
32  
33  
34 89. Foley S, Crawley R, Wilkie S, Ayers S. The Birth Memories and Recall Questionnaire  
35  
36 (BirthMARQ): Development and evaluation. *BMC Pregnancy Childbirth*. 2014;14:15–  
37  
38 20.  
39  
40  
41  
42  
43  
44  
45  
46  
47  
48  
49  
50  
51  
52  
53  
54  
55  
56  
57  
58  
59  
60

1  
2  
3  
4  
5  
6  
7  
8  
9  
10  
11  
12  
13  
14  
15  
16  
17  
18  
19  
20  
21  
22  
23  
24  
25  
26  
27  
28  
29  
30  
31  
32  
33  
34  
35  
36  
37  
38  
39  
40  
41  
42  
43  
44  
45  
46  
47  
48  
49  
50  
51  
52  
53  
54  
55  
56  
57  
58  
59  
60

For peer review only

## DECLARATIONS

### Ethics approval and consent to participate

The EBLS protocol for recruitment and collection of data has been approved by the following ethics boards:

University of Cambridge, School of Social Sciences (18/180) and the Human Biology Research Ethics Committee, UK HBREC.2018.27

University of the Philippines Manila – Research Ethics Board, Philippines, UPMREB 2018-558-01

The Institutional Ethics Committee of Hue University of Medicine and Pharmacy, Vietnam, H2018/430

University of Kelaniya, Faculty of Medicine, Ethics Review Committee, Sri Lanka, P/208/11/2018

National Bioethics Committee (NBC), Pakistan, 4-87/NBC-364/19/1487

Consiliul Stiintific – Universitatea Babes-Bolyai, Romania, 18.362/11.10.2018

University of Cape Town, Department of Health, Western Cape Government, South Africa, WC\_201911\_009

Health Impact Assessment – Western Cape Government

University of Cape Town, Faculty of Health Sciences, Human Research Ethics Committee, South Africa, 057/2019.

Health Research Ethics Committee (HREC) at Stellenbosch University, South Africa, N18/09/099

Ghana Health Service Ethics Review Committee, GHS-ERC008/11/18

University of the West Indies Ethics Committee, Jamaica, ECP 212, 17/18

### **Consent for publication**

Not applicable.

### **Availability of data and material**

Not applicable.

### **Competing interests**

The authors have no financial interests related to the findings reported in this protocol.

### **Funding**

The work of the Evidence for Better Lives Study was supported by the Jacobs Foundation, UBS Optimus Foundation, Fondation Botnar, the Consuelo Zobel Alger Foundation, the British Academy, the Cambridge Humanities Research Grants Scheme, the ESRC Impact Acceleration Account Programme, a Queensland University of Technology Postgraduate Research Award, Higher Degree Research Student Supplementary Research Funding from Queensland University of Technology, the University of Edinburgh College Office for the College of Arts, the Humanities and Social Sciences *SFC ODA* Global Challenges Internal Fund, the University of Cambridge GCRF Quality Research Fund, and the Wolfson Professor of Criminology Discretionary Fund. The views expressed are those of the authors and not necessarily those of the funding bodies.

### **Authors' contributions**

Sara Valdebenito helped to plan the methods for EBL5-FR, drafted the paper, and took the lead in revisions.

Aja Louise Murray, Claire Hughes, Adriana Baban, Asvini D. Fernando, Bernadette Madrid, Catherine L. Ward, Joseph Osafo, Michael P. Dunne, Siham Sikander, Susan Walker, Vo Van

1  
2  
3 Thang, Mark Tomlinson, Pasco Fearon, Marguerite Marlow and Diana Taut helped to plan the  
4 methods, reviewed multiple drafts of the paper, and approved the final version submitted.  
5  
6

7  
8 Deshanie Chathurika helped to develop the father questionnaire, reviewed multiple drafts of  
9 the paper, and approved the final version submitted.  
10  
11

12 Yulia Shenderovich helped to draft some sections of the paper and contributed with the  
13 revisions.  
14  
15

16  
17 Manuel Eisner is the principal investigator. He articulated the scientific bases of the study,  
18 reviewed multiple drafts of the paper, and approved the final version submitted.  
19  
20  
21  
22

### 23 24 **Acknowledgements**

25  
26 Special thanks go to the field staff for their amazing work and also to the mothers and fathers  
27 across the sites who kindly contributed to make EBLS-FR possible. Gratitude also goes to the  
28 medical staff involved in the recruitment of participants.  
29  
30  
31

32  
33 Thanks to the coordination team in Cambridge for their support throughout the EBLS-FR.  
34  
35  
36  
37  
38  
39  
40  
41  
42  
43  
44  
45  
46  
47  
48  
49  
50  
51  
52  
53  
54  
55  
56  
57  
58  
59  
60

## TABLES

Table 1. EBLS sites: Selected country indicators

|              | Homicide rates <sup>a</sup> | Gender Inequality Index <sup>b</sup> | GDP in \$ (PPP) <sup>c</sup> | Crude birth rate <sup>d</sup> | % Population aged 0-14 <sup>e</sup> |
|--------------|-----------------------------|--------------------------------------|------------------------------|-------------------------------|-------------------------------------|
| Philippines  | 14.8                        | .427                                 | 8,935.3                      | 23                            | 32%                                 |
| Vietnam      | 3.8                         | .304                                 | 7,434.77                     | 17                            | 23%                                 |
| Sri Lanka    | 3.0                         | .354                                 | 13,449.99                    | 15                            | 24%                                 |
| Pakistan     | 9.6                         | .541                                 | 5,543.99                     | 28                            | 35%                                 |
| Romania      | 1.6                         | .311                                 | 26,595.44                    | 10                            | 15%                                 |
| South Africa | 33.1                        | .389                                 | 13,661.44                    | 21                            | 29%                                 |
| Ghana        | 9.7                         | .538                                 | 4,738738.3                   | 31                            | 39%                                 |
| Jamaica      | 39.1                        | .412                                 | 9,298.88                     | 16                            | 23%                                 |
| Global       | 6.4                         | .441                                 | 17,971.072                   | 19                            | 26%                                 |

Sources: a. (37); b.(38); c. (66); d. (67); e. (68).

Table 2. Incentives por participants

| Sites        | Incentive Baseline            | Cost (£) | Incentive Follow-up       | Cost (£) | Incentives for fathers | Cost (£) |
|--------------|-------------------------------|----------|---------------------------|----------|------------------------|----------|
| Philippines  | Groceries                     | 2        | Groceries                 | 2        | Groceries              | 2        |
| Vietnam      | Voucher                       | 5        | Voucher                   | 5        |                        |          |
| Sri Lanka    | Grocery voucher               | 4.78     | Bank deposit for the baby | 4.56     | Grocery voucher        | 4.78     |
| Pakistan     | Household items for the woman | 2.5      | Jumper suit for the baby  | 2.5      | N/A                    | N/A      |
| Romania      | Grocery vouchers              | 27       | Grocery vouchers          | 10       | N/A                    | N/A      |
| South Africa | Grocery voucher               | 9        | Grocery voucher           | 9        | N/A                    | N/A      |
| Ghana        | Money                         | 2.78     | Money                     | 2.78     | N/A                    | N/A      |
| Jamaica      | Phones Cards                  | 4.26     | Phones Cards              | 4.26     | N/A                    | N/A      |

Note: Differences in cost are explained by their gross domestic product per capita at nominal values (66).

Table 3. EBLS-FR measures for mother's questionnaire

| Measures     | Sources                                                      | N° Items | Phase    | Data collection strategy |
|--------------|--------------------------------------------------------------|----------|----------|--------------------------|
| Demographics | DHS (69)<br>MacArthur Scale of subjective social status (70) | 27       | Baseline | CAPi                     |

|                                       |                                                                                                                    |    |                        |        |
|---------------------------------------|--------------------------------------------------------------------------------------------------------------------|----|------------------------|--------|
| Prenatal health                       | Adapted from:<br>The South Asian Birth Cohort (START)<br>(71)<br>Millennium Cohort Study (72)                      | 20 | Baseline               | CAPI   |
| Attitudes towards physical punishment | Attitudes towards spanking (73)                                                                                    | 5  | Baseline               | CAPI   |
| Community characteristics             | Community characteristics scale – Adapted (74)                                                                     | 20 | Baseline               | CAPI   |
| Adverse childhood experiences         | WHO 2009, International ACE-IQ Questionnaire Adapted version (75)                                                  | 19 | Baseline               | A-CASI |
| Intimate partner violence             | WHO Multi-country Study on Women Health and Domestic Violence against Women (46)                                   | 13 | Baseline               | A-CASI |
| Partner supportiveness                | Partner supportiveness/ relationship scale (76)                                                                    | 4  | Baseline               | CAPI   |
| Social support                        | Social support scale (77)                                                                                          | 13 | Baseline               | CAPI   |
| Well-being                            | WHO-5 Well-Being Index (78)                                                                                        | 5  | Baseline               | CAPI   |
| Depression                            | PHQ9 (79)                                                                                                          | 9  | Baseline and follow-up | CAPI   |
| Suicidality                           | Suicidality item (80)                                                                                              | 1  | Baseline               | CAPI   |
| Stress                                | Perceived Stress Scale (81)                                                                                        | 10 | Baseline               | CAPI   |
| Aggression                            | The Brief Aggression Questionnaire (82)                                                                            | 12 | Baseline               | CAPI   |
| ADHD symptoms                         | Adult ADHD symptoms -Adapted (83)                                                                                  | 6  | Baseline               | CAPI   |
| Self-control                          | Brief Self-Control Scale (84)                                                                                      | 8  | Baseline               | CAPI   |
| Substance use                         | Alcohol, Smoking and Substance Involvement Screening Test (ASSIST) – Adapted version WHO ASSIST Working Group (85) | 9  | Baseline               | A-CASI |
| Pregnancy related beliefs             | Prenatal Attachment Inventory – Revised (86)                                                                       | 18 | Baseline               | CAPI   |
| Newborn health and well-being         | Norwegian Mother and Child Cohort Study (MoBa) (87)<br>Questionnaire for breastfeeding mothers (88)                | 8  | Follow-up              | CAPI   |
| The mother's birth memories           | The Birth Memories and Recall Questionnaire (89)                                                                   | 5  | Follow-up              | CAPI   |

Table 4. EBLS-FR measures for father's questionnaire

| Measures                                        | Sources                                                               | N° Items | Phase                 | Data collection strategy |
|-------------------------------------------------|-----------------------------------------------------------------------|----------|-----------------------|--------------------------|
| Feelings about fatherhood (prenatal)            | Adapted from the Avon Longitudinal Study of Parents and Children (60) | 13       | Baseline              | Paper and pencil         |
| Fathers' participation for antenatal care       | (61,62)                                                               | 7        | Baseline<br>Follow-up | Paper and pencil         |
| Fathers' participation for household activities | Adapted from the Avon Longitudinal Study of Parents and Children .    | 8        | Baseline<br>Follow-up | Paper and pencil         |

|    |                     |                                        |   |           |           |
|----|---------------------|----------------------------------------|---|-----------|-----------|
| 1  |                     |                                        |   |           |           |
| 2  |                     |                                        |   |           |           |
| 3  | Attitudes to        | Avon Longitudinal Study of Parents and | 8 | Follow-up | Paper and |
| 4  | fatherhood          | Children (60)                          |   |           | pencil    |
| 5  |                     |                                        |   |           |           |
| 6  | Paternal enjoyment  | Avon Longitudinal Study of Parents and | 5 | Follow-up | Paper and |
| 7  |                     | Children (60)                          |   |           | pencil    |
| 8  |                     |                                        |   |           |           |
| 9  | Paternal confidence | Avon Longitudinal Study of Parents and | 4 | Follow-up | Paper and |
| 10 |                     | Children (60)                          |   |           | pencil    |
| 11 |                     |                                        |   |           |           |
| 12 | Activities with the | Avon Longitudinal Study of Parents and | 6 | Follow-up | Paper and |
| 13 | newborn child       | Children (60)                          |   |           | pencil    |
| 14 |                     |                                        |   |           |           |
| 15 |                     |                                        |   |           |           |
| 16 |                     |                                        |   |           |           |
| 17 |                     |                                        |   |           |           |
| 18 |                     |                                        |   |           |           |
| 19 |                     |                                        |   |           |           |
| 20 |                     |                                        |   |           |           |
| 21 |                     |                                        |   |           |           |
| 22 |                     |                                        |   |           |           |
| 23 |                     |                                        |   |           |           |
| 24 |                     |                                        |   |           |           |
| 25 |                     |                                        |   |           |           |
| 26 |                     |                                        |   |           |           |
| 27 |                     |                                        |   |           |           |
| 28 |                     |                                        |   |           |           |
| 29 |                     |                                        |   |           |           |
| 30 |                     |                                        |   |           |           |
| 31 |                     |                                        |   |           |           |
| 32 |                     |                                        |   |           |           |
| 33 |                     |                                        |   |           |           |
| 34 |                     |                                        |   |           |           |
| 35 |                     |                                        |   |           |           |
| 36 |                     |                                        |   |           |           |
| 37 |                     |                                        |   |           |           |
| 38 |                     |                                        |   |           |           |
| 39 |                     |                                        |   |           |           |
| 40 |                     |                                        |   |           |           |
| 41 |                     |                                        |   |           |           |
| 42 |                     |                                        |   |           |           |
| 43 |                     |                                        |   |           |           |
| 44 |                     |                                        |   |           |           |
| 45 |                     |                                        |   |           |           |
| 46 |                     |                                        |   |           |           |
| 47 |                     |                                        |   |           |           |
| 48 |                     |                                        |   |           |           |
| 49 |                     |                                        |   |           |           |
| 50 |                     |                                        |   |           |           |
| 51 |                     |                                        |   |           |           |
| 52 |                     |                                        |   |           |           |
| 53 |                     |                                        |   |           |           |
| 54 |                     |                                        |   |           |           |
| 55 |                     |                                        |   |           |           |
| 56 |                     |                                        |   |           |           |
| 57 |                     |                                        |   |           |           |
| 58 |                     |                                        |   |           |           |
| 59 |                     |                                        |   |           |           |
| 60 |                     |                                        |   |           |           |

For peer review only



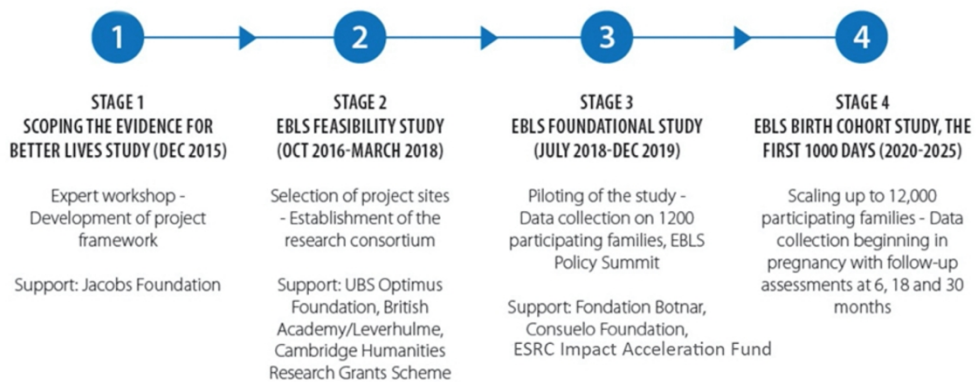

Figure 1. The four main stages of Evidence for Better Lives

1  
2  
3  
4  
5  
6  
7  
8  
9  
10  
11  
12  
13  
14  
15  
16  
17  
18  
19  
20  
21  
22  
23  
24  
25  
26  
27  
28  
29  
30  
31  
32  
33  
34  
35  
36  
37  
38  
39  
40  
41  
42  
43  
44  
45  
46  
47  
48  
49  
50  
51  
52  
53  
54  
55  
56  
57  
58  
59  
60

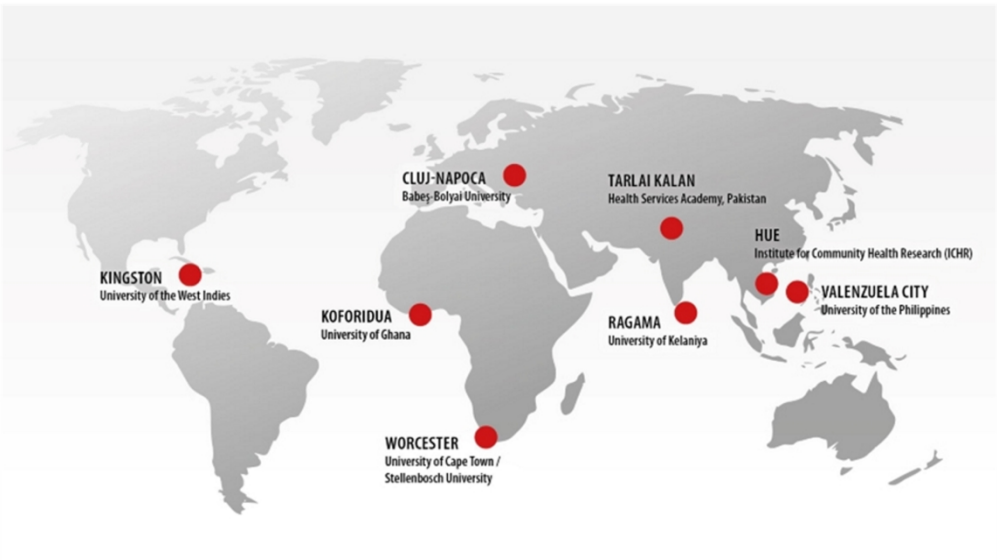

Figure 2. Evidence for Better Lives study sites
